# Supplementary material for: Indole Alkaloids and Chromones from the Stem Bark of Cassia alata and Their Antiviral Activities
Source: MDPI journal article supplement (doi:10.3390/molecules27103129), 2022-05-13
Supplement: s1 [file s1]

# **Indole Alkaloids and Chromones from The Stem Bark of *Cassia alata* and Their Antiviral Activities**

**Pei-Song Yang<sup>1,2</sup>, Jia-Meng Dai<sup>1,2</sup>, Xue-Jiao Gu<sup>1</sup>, Wen Xiong<sup>2</sup>, De-Quan Huang<sup>1</sup>, Shi-Yu Qiu<sup>1</sup>, Jun-Na Zheng<sup>1</sup>, Yong Li<sup>2</sup>, Feng-Xian Yang<sup>1,2,\*</sup>, Min Zhou<sup>1,\*</sup>**

<sup>a</sup> *Key Laboratory of Chemistry in Ethnic Medicinal Resources, State Ethnic Affairs Commission & Ministry of Education, Yunnan Minzu University, Kunming 650031, P.R. China. E-mail: jszxtg\_2015@163.com, zhouminynun@163.com;*

<sup>b</sup> *Yunnan Key Laboratory of Tobacco Chemistry, China tobacco yunnan industrial Co., Ltd, Kunming 650231, P.R. China. E-mail: 2091085534@qq.com.*

<sup>\*</sup> Correspondence: jszxtg\_2015@163.com (M. Z.); zhouminynun@163.com (M. Z.); yangfengxian90@163.com (F.-X. Y.);

Tel.: +86-0871-65919542 (M. Z.); Fax: +0871-65919542 (M. Z.).

## Contents

**Figure S1.**  $^{13}\text{C}$  and DEPT NMR spectrum of alataindolein A (1)

**Figure S2.**  $^1\text{H}$  NMR spectrum of alataindolein A (1)

**Figure S3.** HSQC NMR spectrum of alataindolein A (1)

**Figure S4.** HMBC NMR spectrum of alataindolein A (1)

**Figure S5.**  $^{13}\text{C}$  and DEPT NMR spectrum of alataindolein B (2)

**Figure S6.**  $^1\text{H}$  NMR spectrum of alataindolein B (2)

**Figure S7.**  $^{13}\text{C}$  and DEPT NMR spectrum of alataindolein C (3)

**Figure S8.**  $^1\text{H}$  NMR spectrum of alataindolein C (3)

**Figure S9.**  $^{13}\text{C}$  and DEPT spectrum of alatachromone A (4)

**Figure S10.**  $^1\text{H}$  NMR spectrum of alatachromone A (4)

**Figure S11.** HSQC spectrum of alatachromone A (4)

**Figure S12.** HMBC spectrum of alatachromone A (4)

**Figure S13.**  $^{13}\text{C}$  and DEPT NMR spectrum of alataindolein D (5)

**Figure S14.**  $^1\text{H}$  NMR spectrum of alataindolein D (5)

**Figure S15.** HSQC NMR spectrum of alataindolein D (5)

**Figure S16.** HMBC NMR spectrum of alataindolein D (5)

**Figure S17.** The antiviral inhibition rates tested by half-leaf method for compounds 2–4

**Figure S18.** The protective effects of compounds 2–4 on TMV

**Figure S1.**  $^{13}\text{C}$  and DEPT NMR spectrum of alataindolein A (**1**)

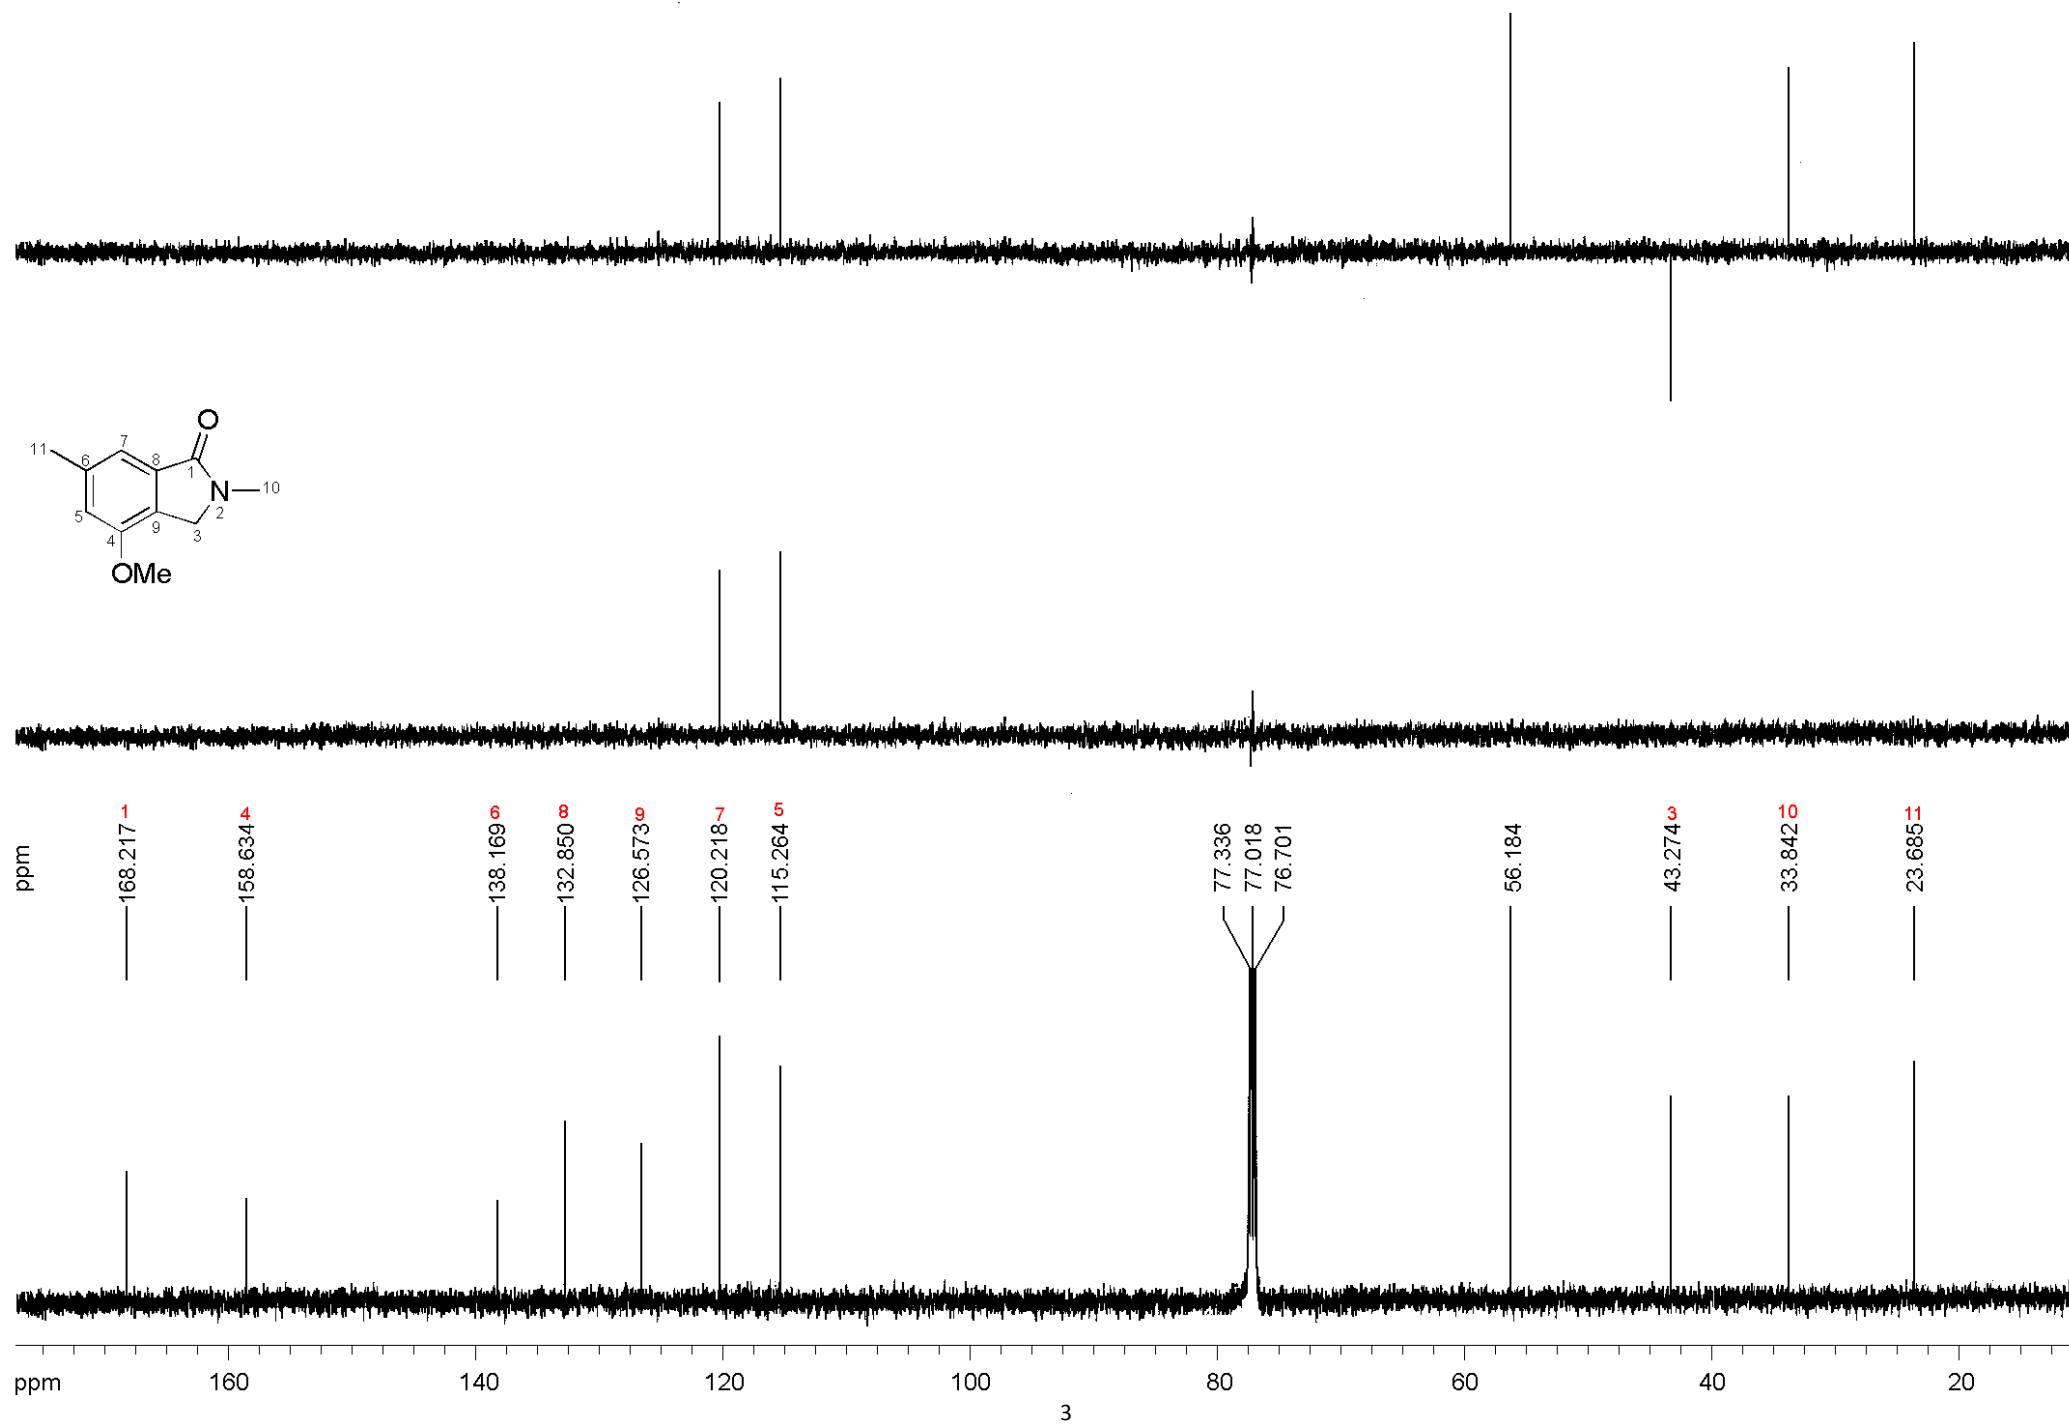

Figure S2.  $^1\text{H}$  NMR spectrum of alataindolein A (1)

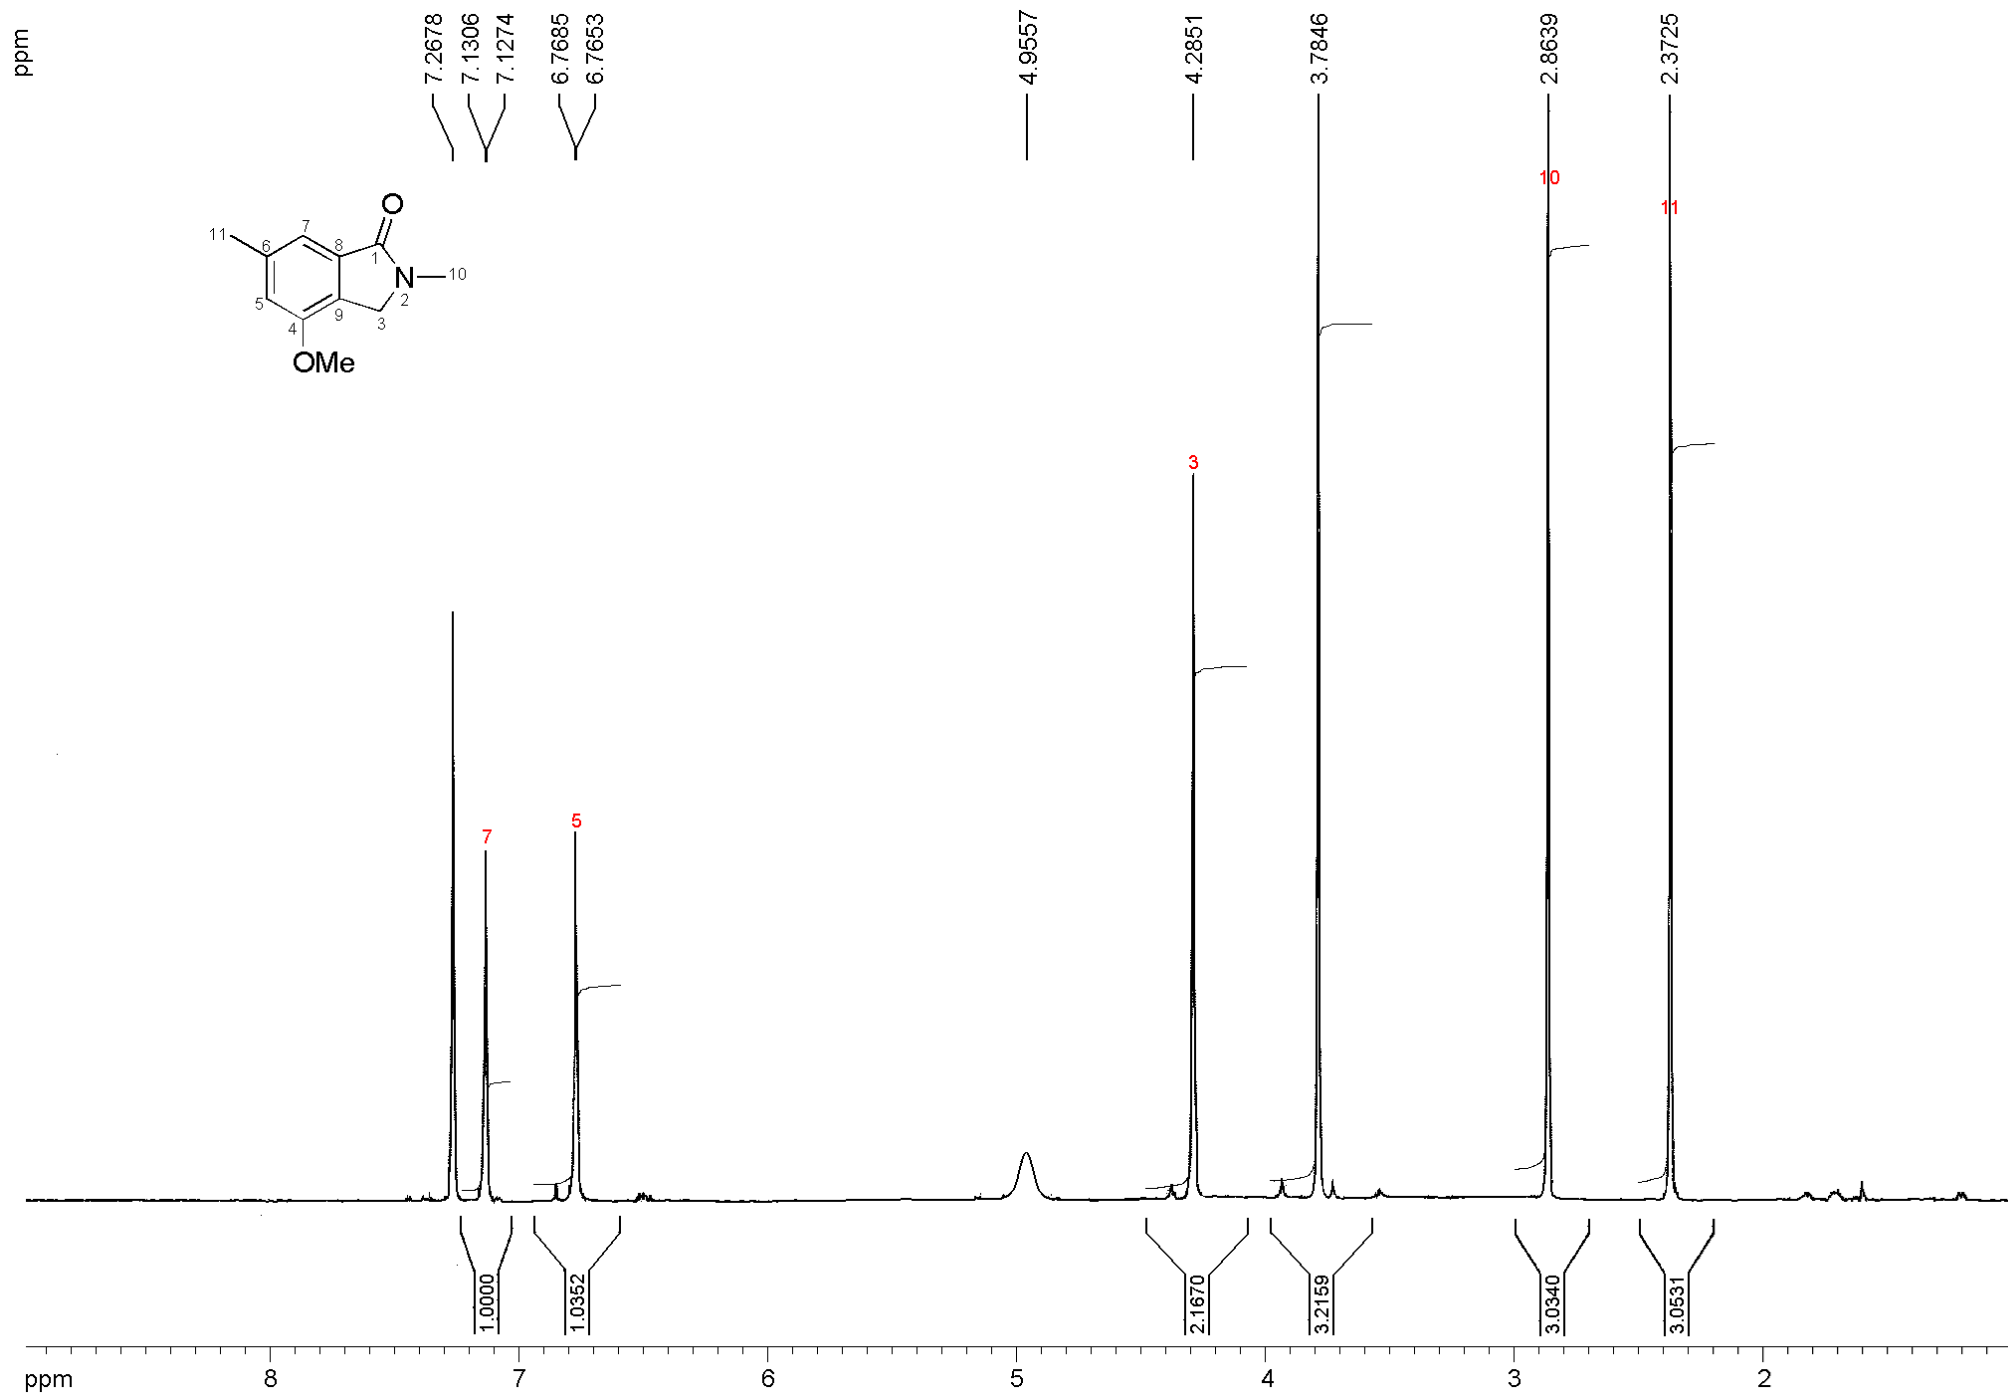

Figure S3. HSQC NMR spectrum of alataindolein (1)

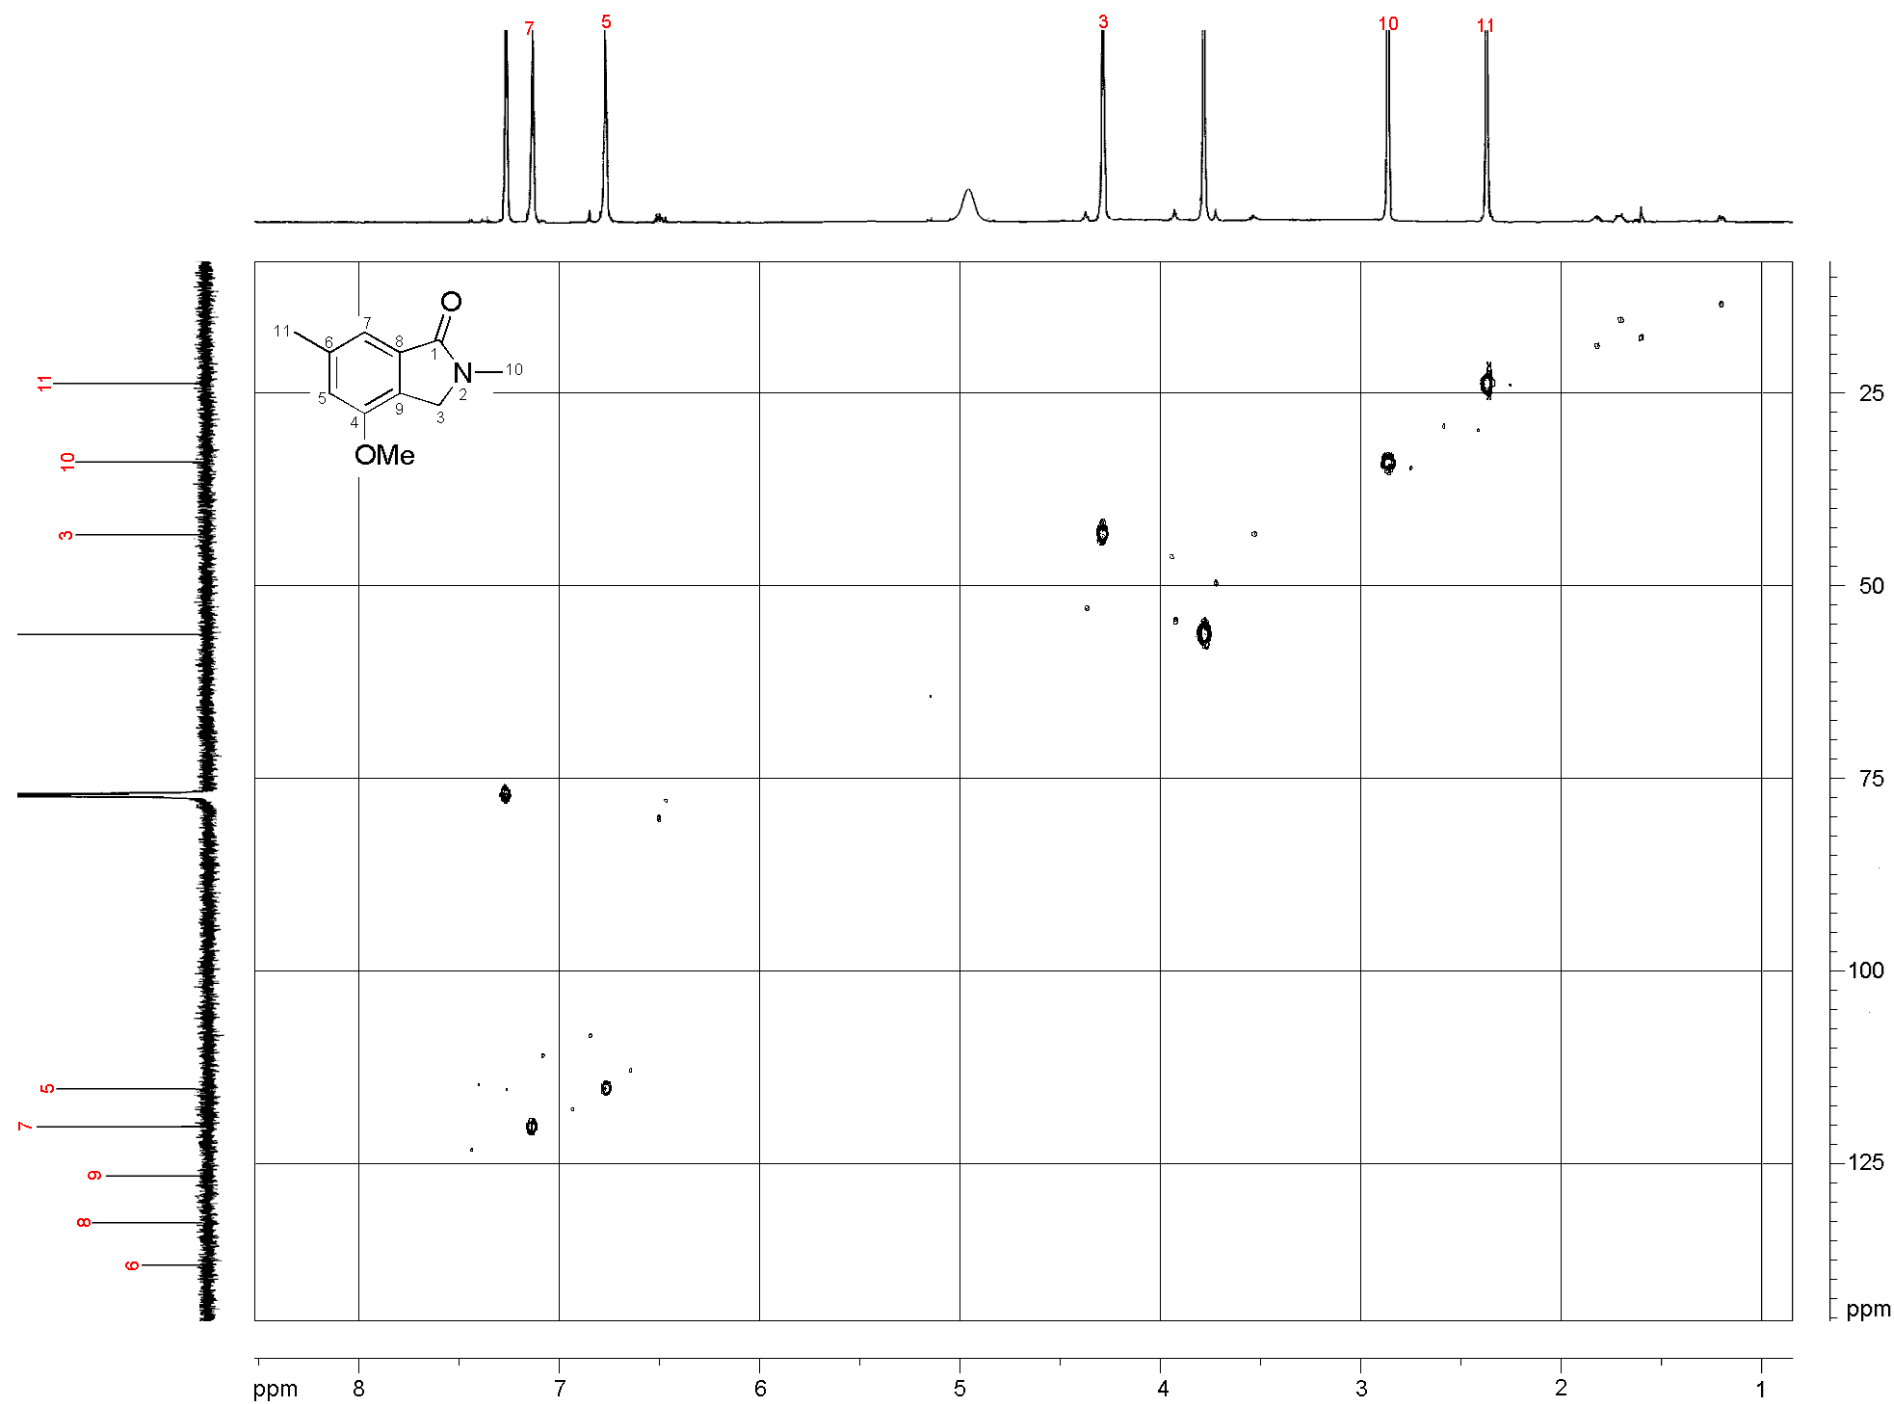

Figure S4. HMBC NMR spectrum of alataindolein A (**1**)

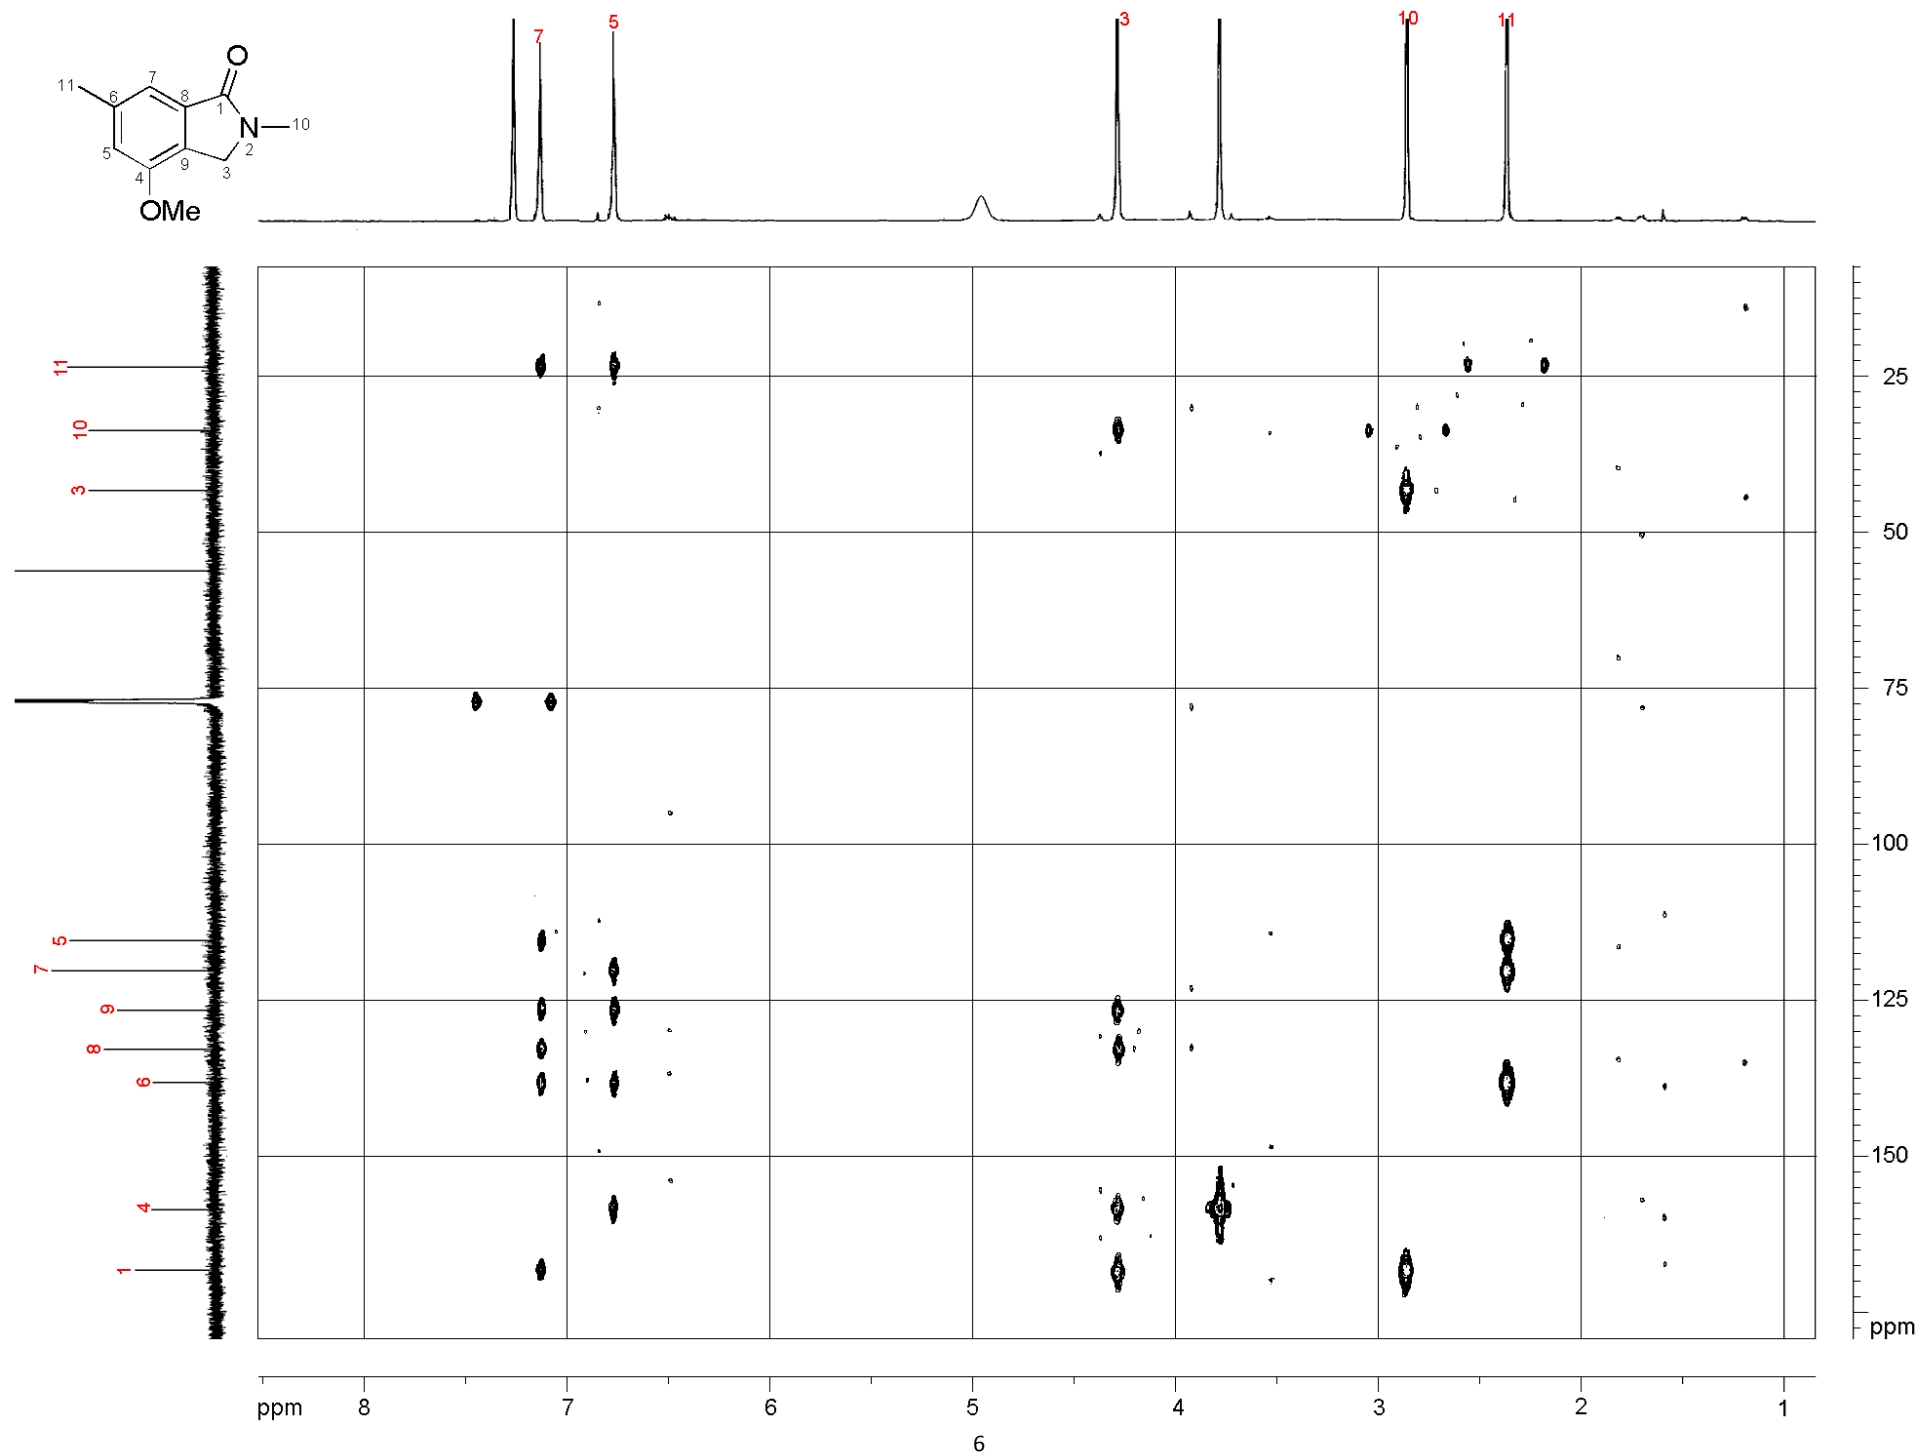

**Figure S5.**  $^{13}\text{C}$  and DEPT NMR spectrum of alataindolein B (**2**)

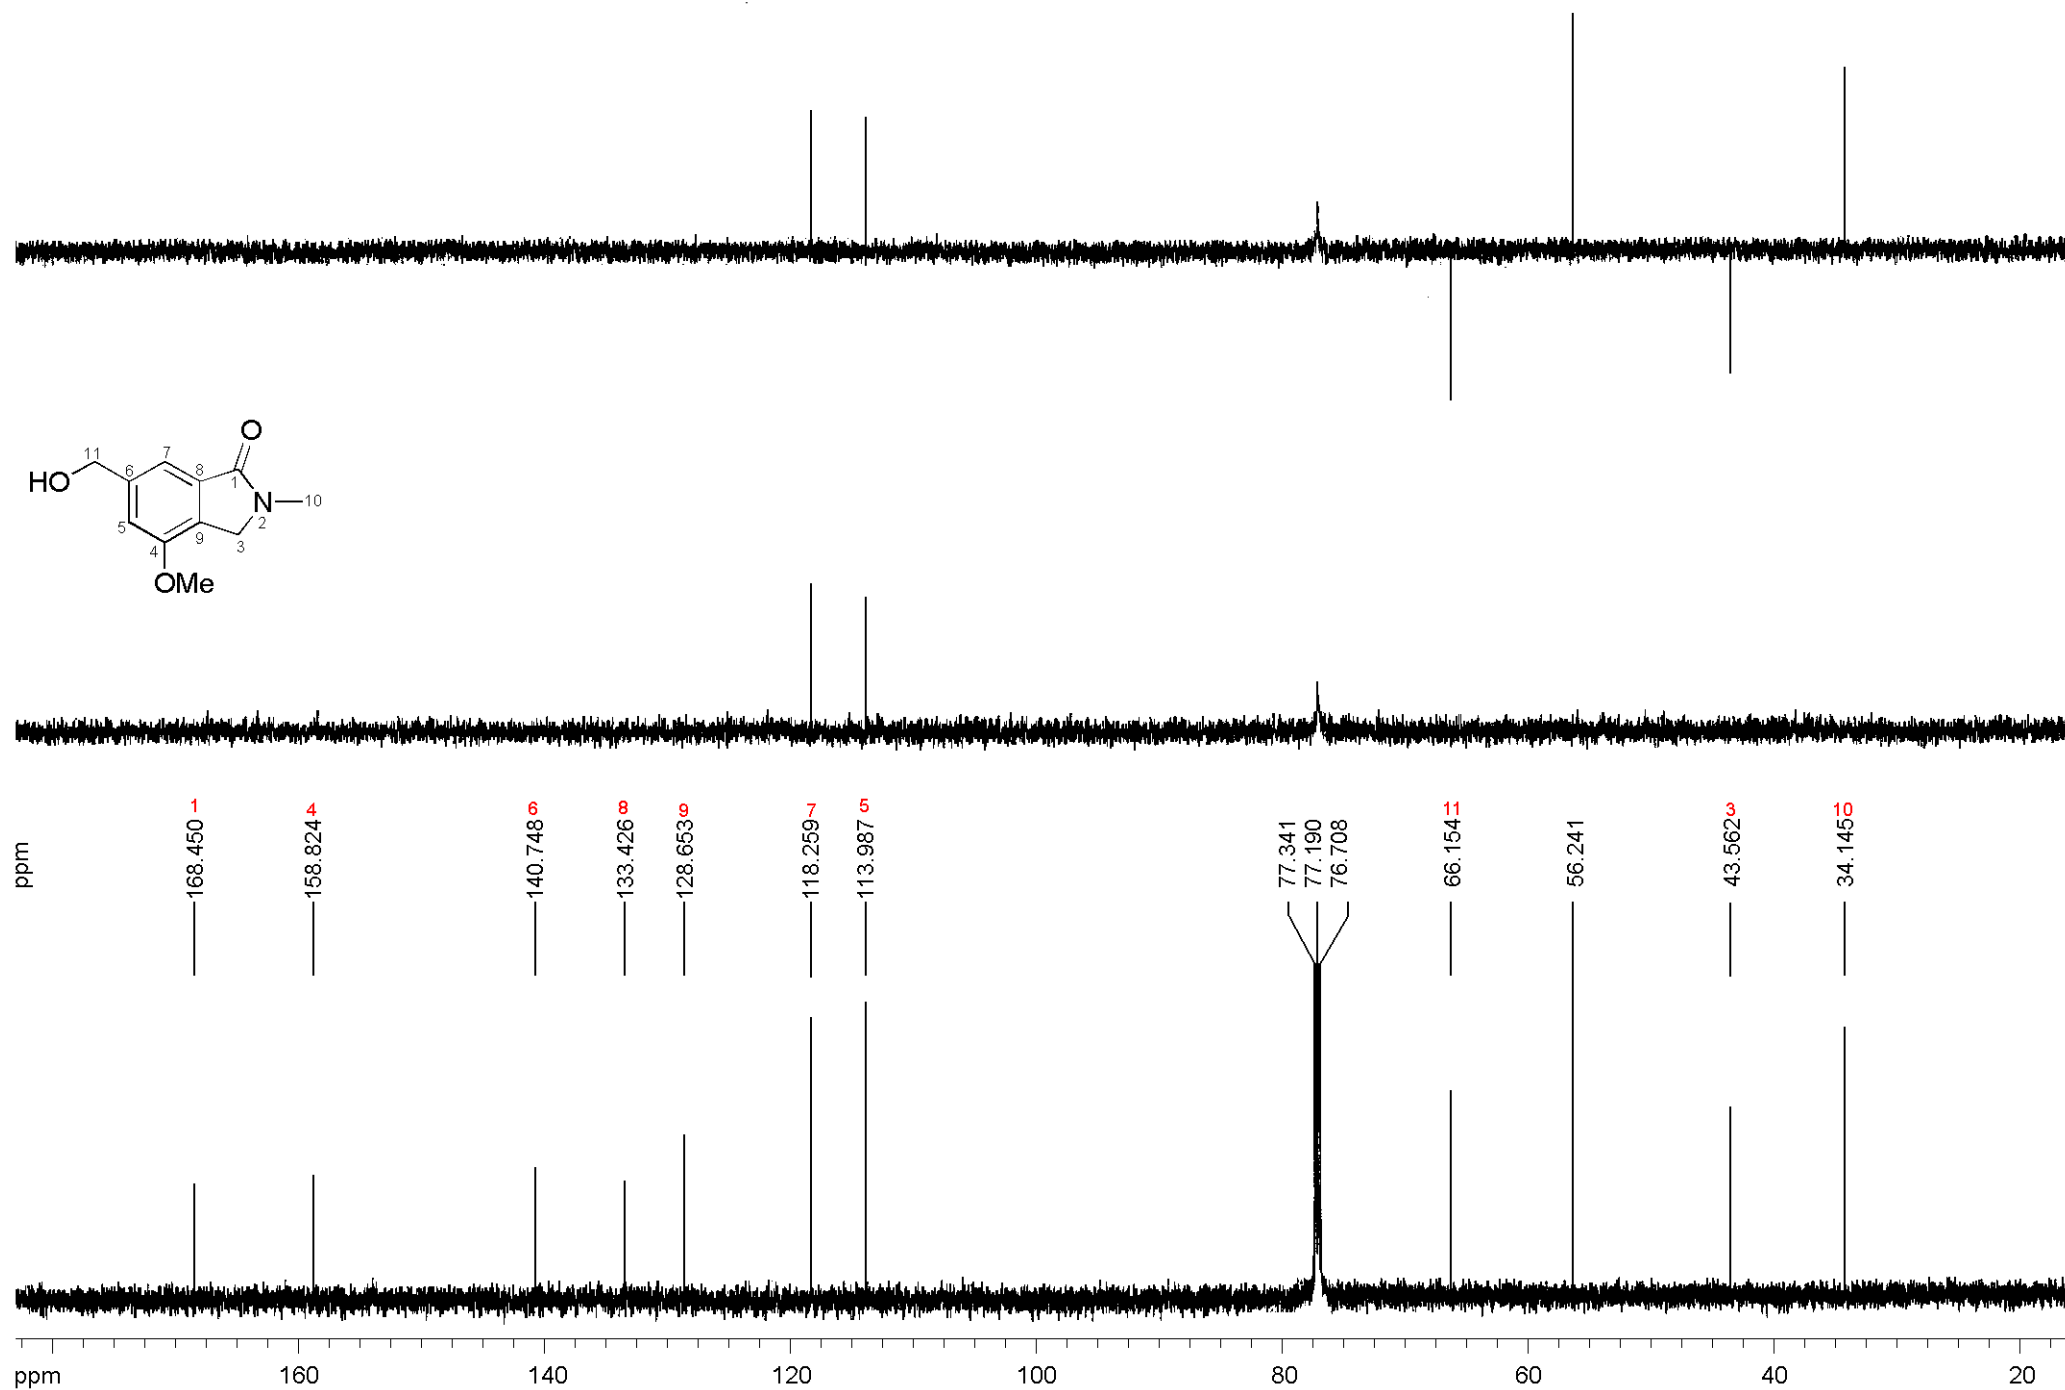

Figure S6.  $^1\text{H}$  NMR spectrum of alataindolein B (2)

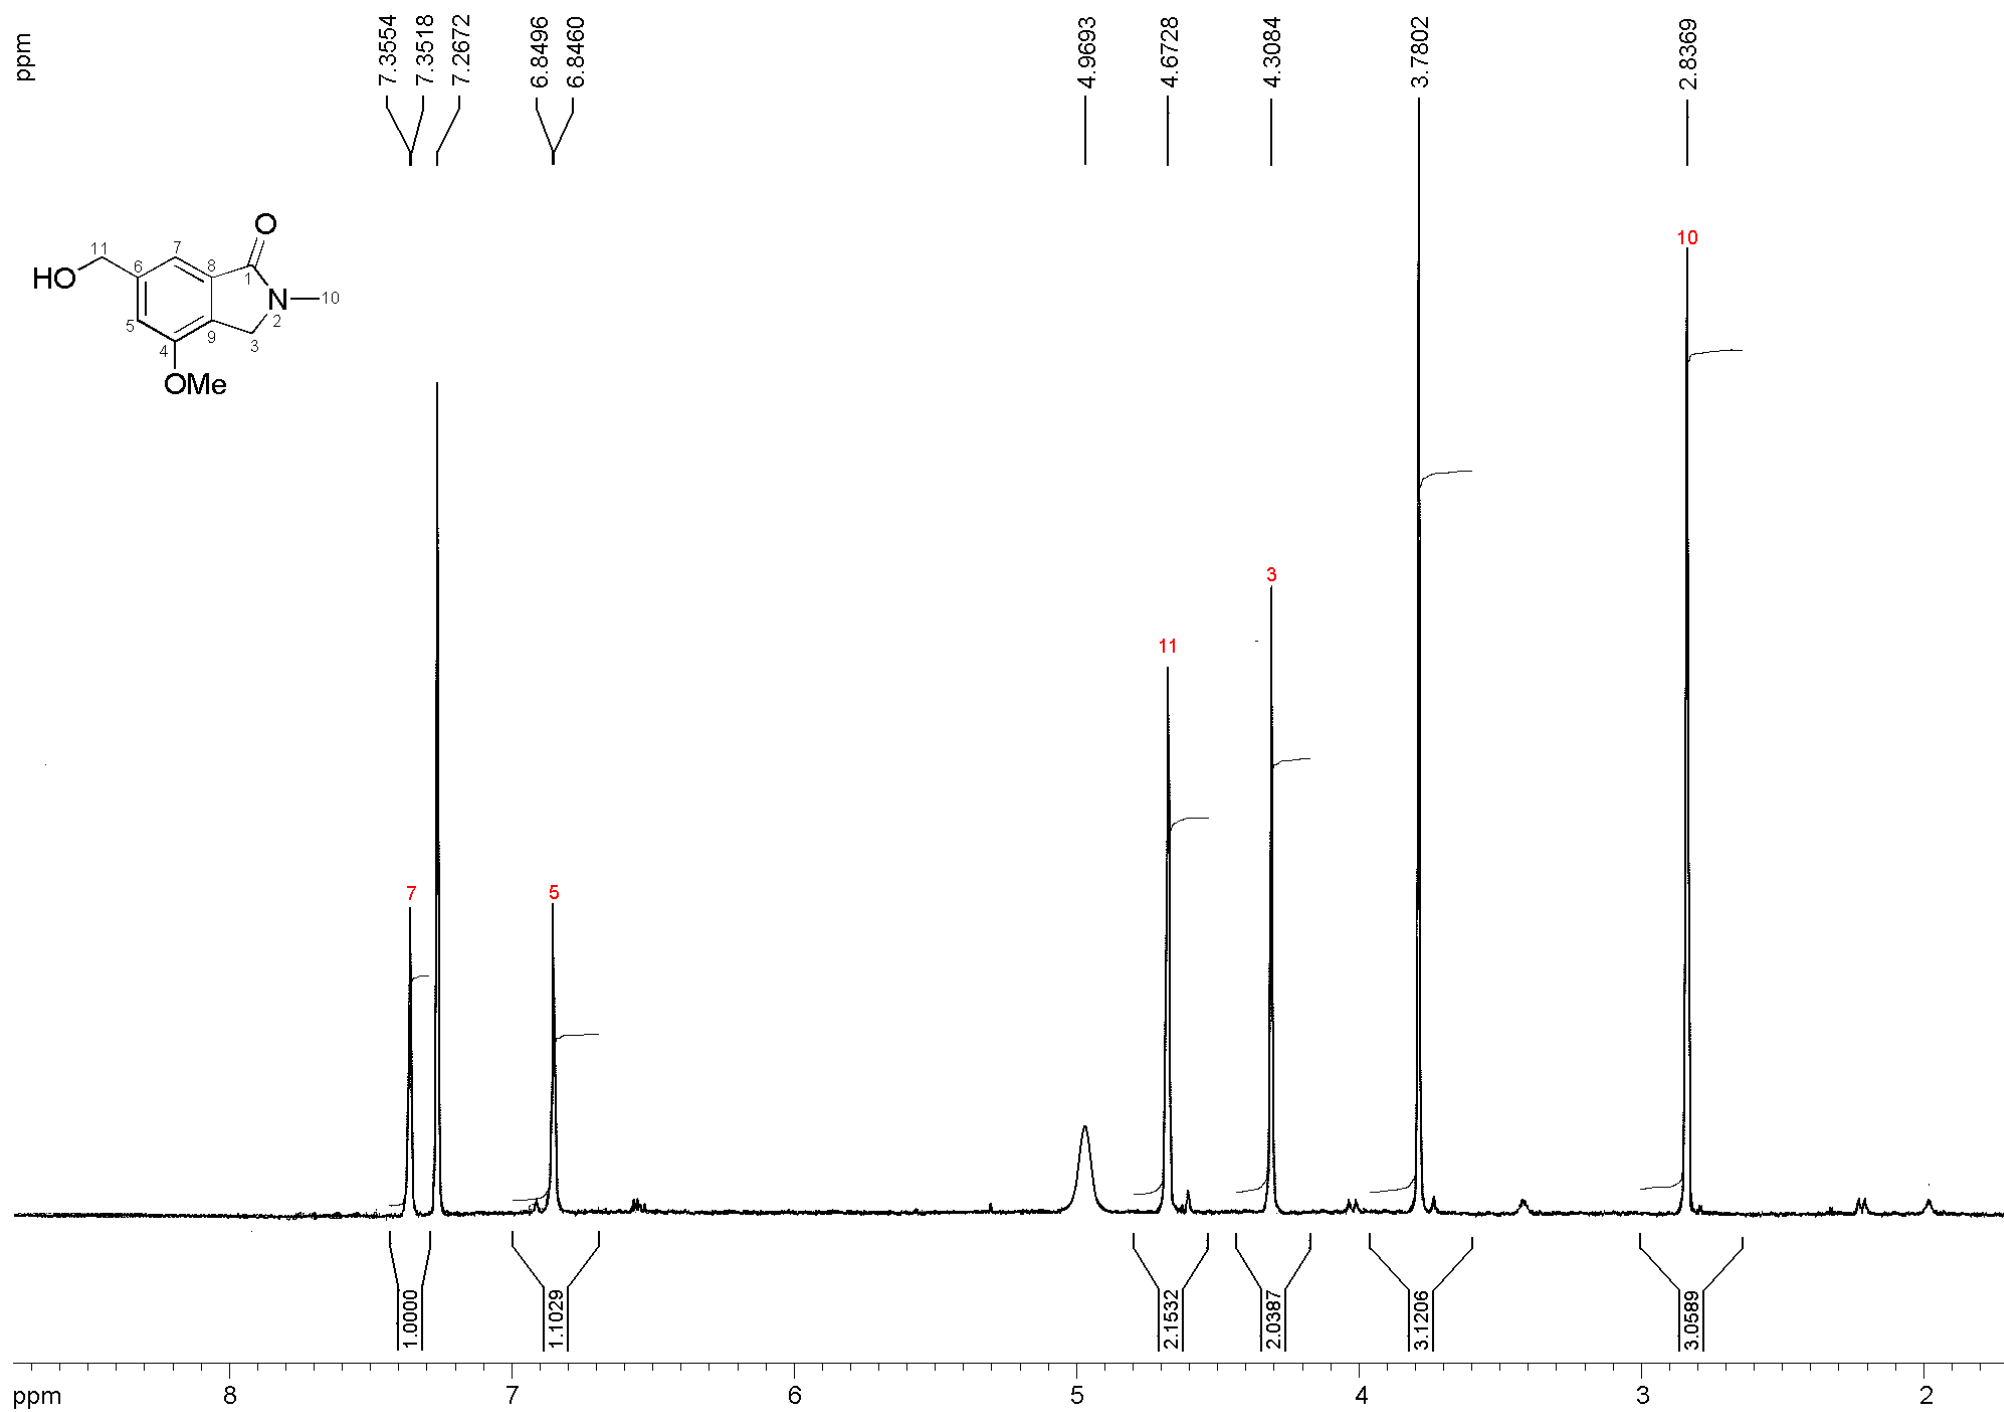



Figure S7.  $^{13}\text{C}$  and DEPT NMR spectrum of alataindolein C (**3**)

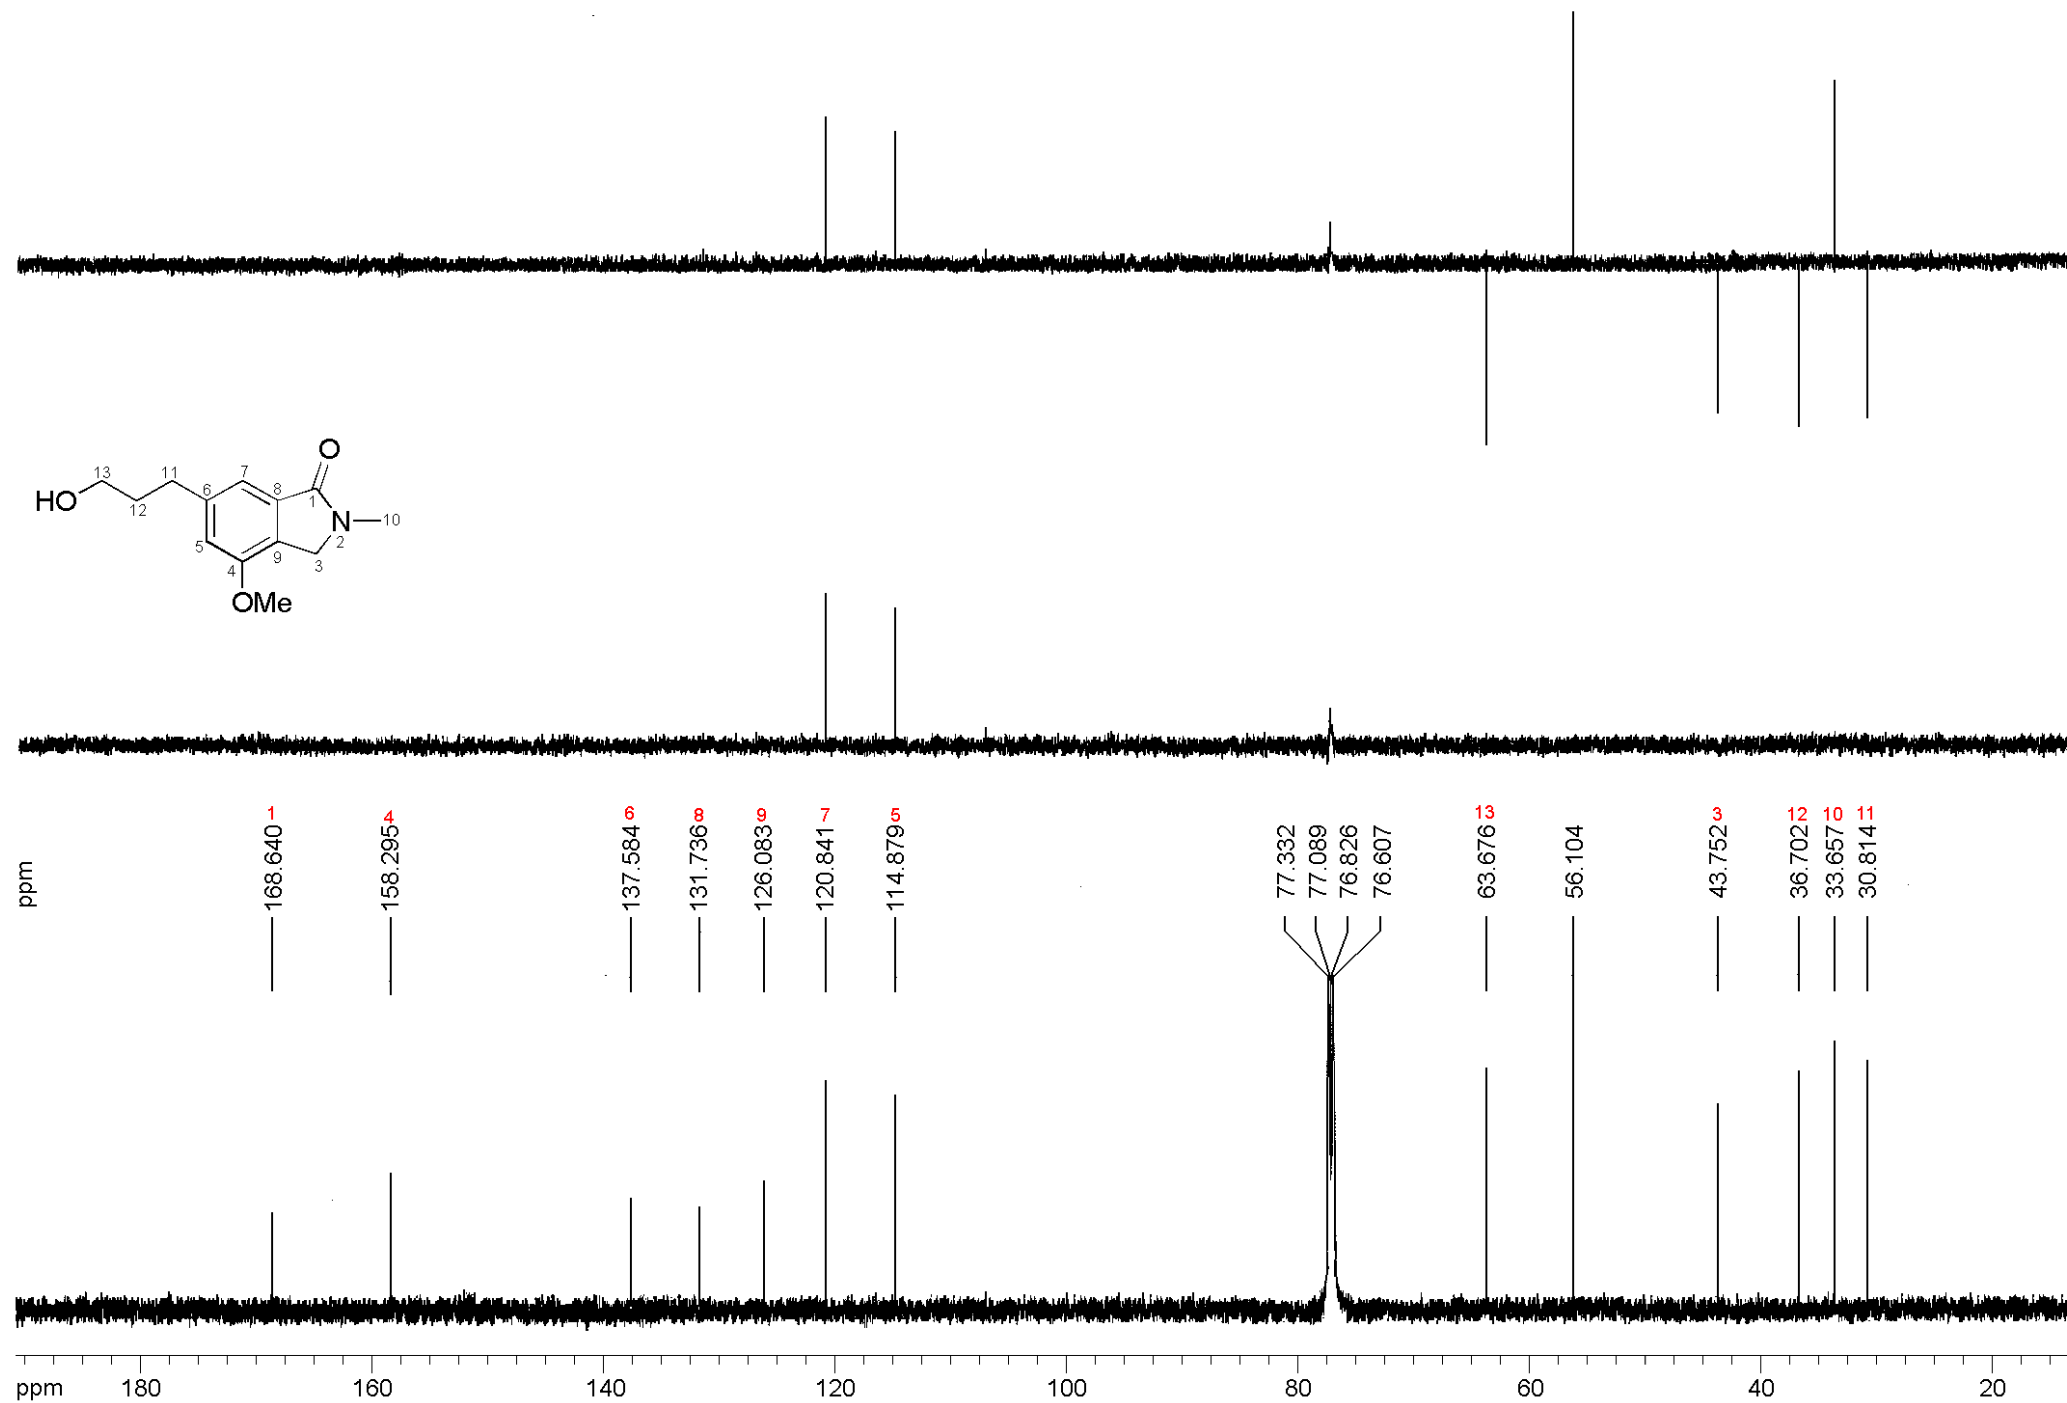

**Figure S8.**  $^1\text{H}$  NMR spectrum of alataindolein C (**3**)

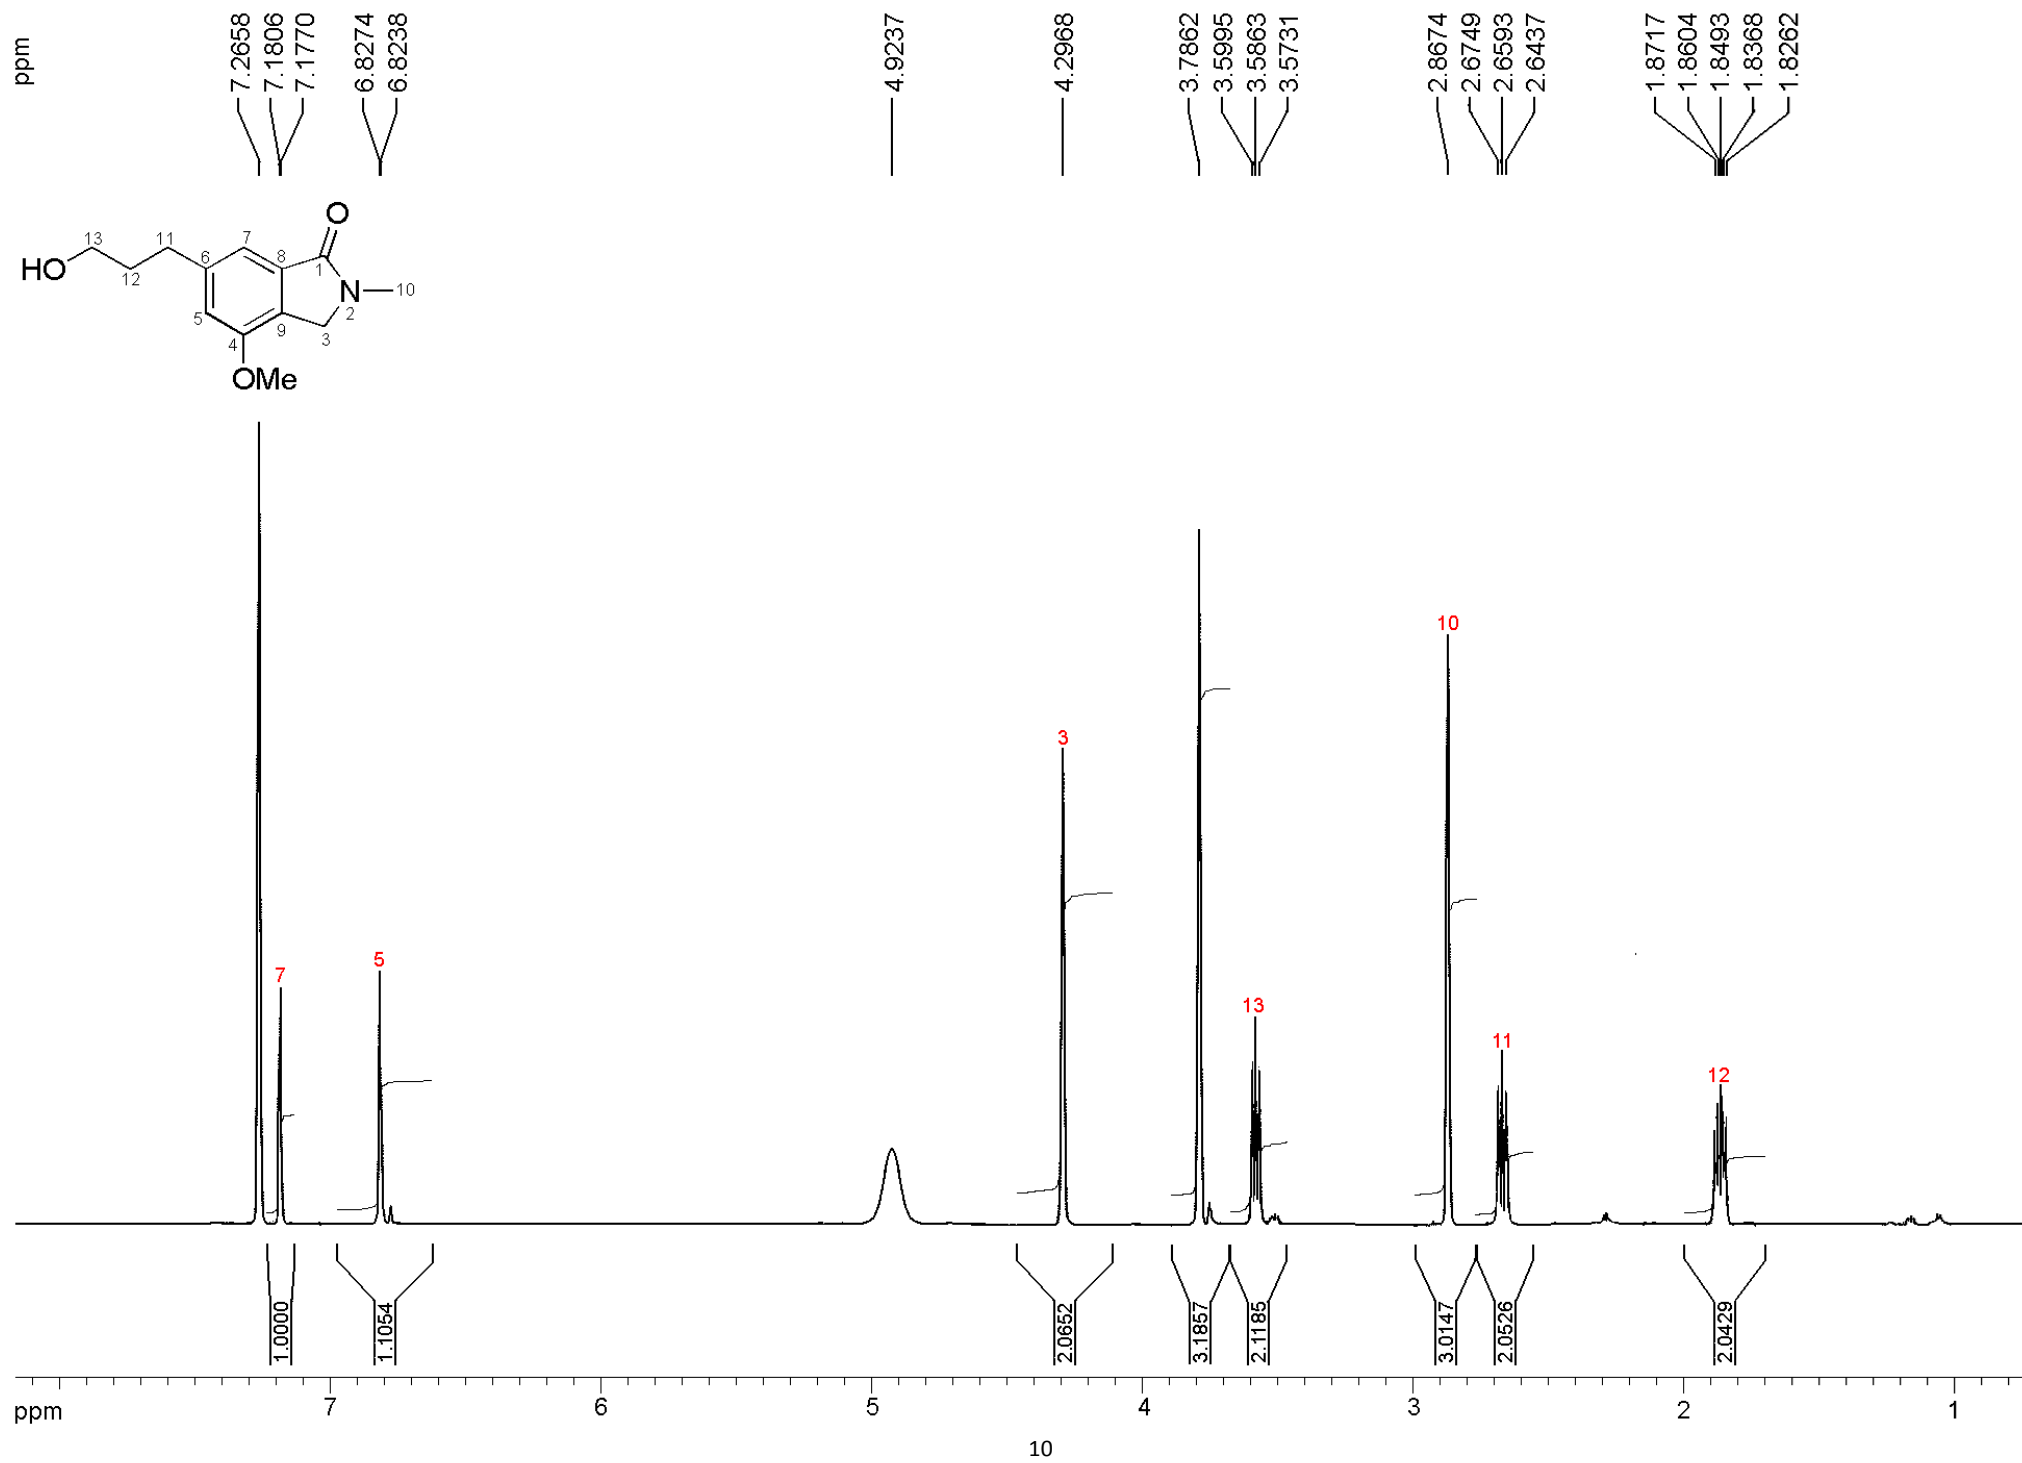

Figure S9.  $^{13}\text{C}$  and DEPT spectrum of alatachromone A (4)

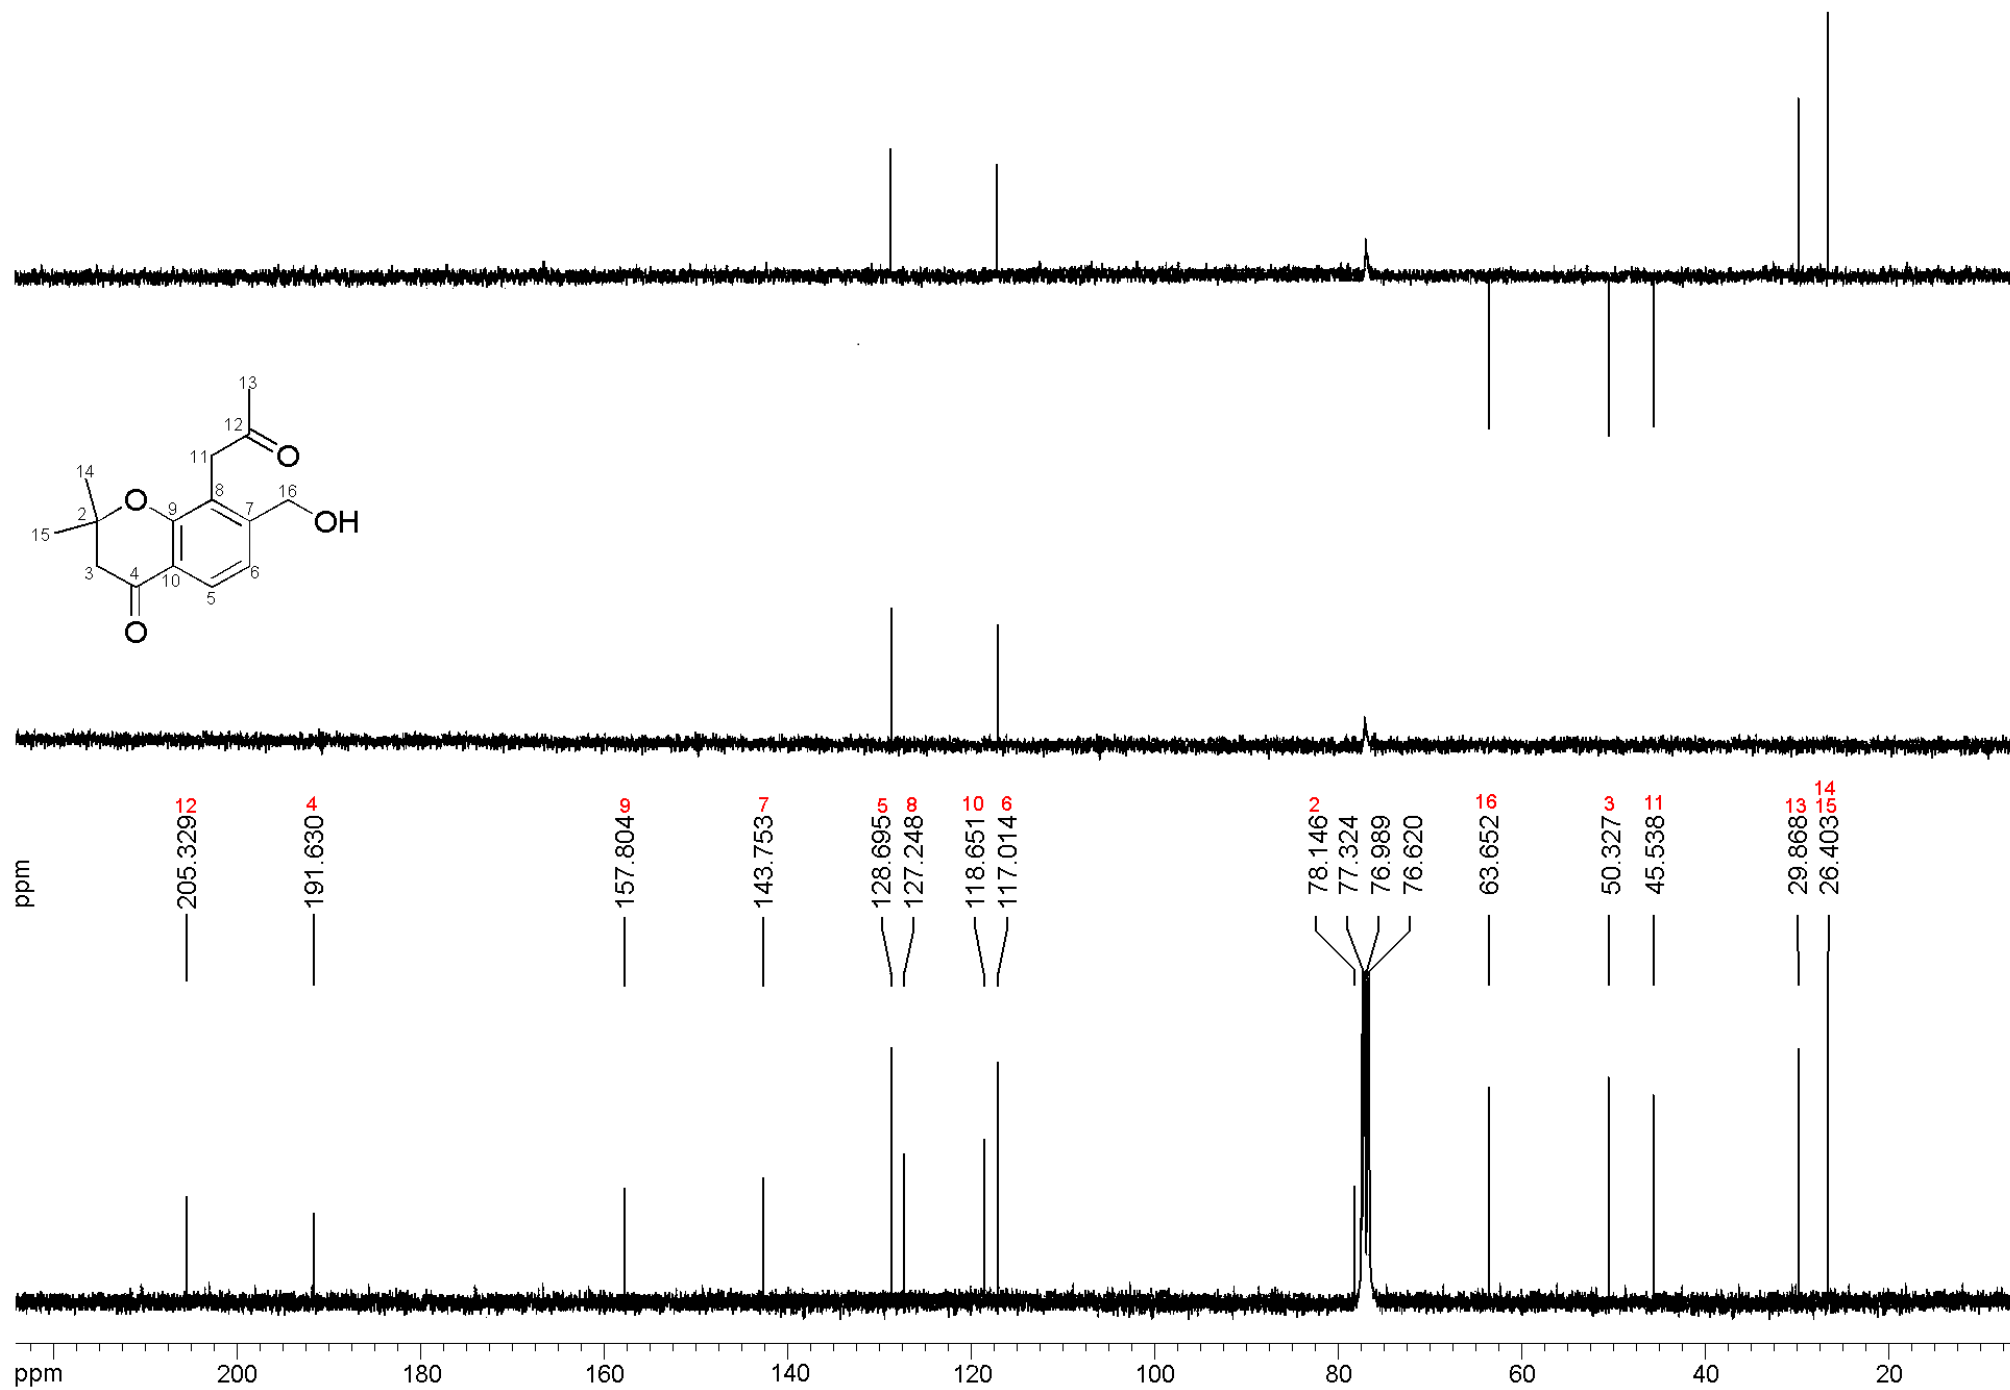

Figure S10.  $^1\text{H}$  NMR spectrum of alatachromone A (4)

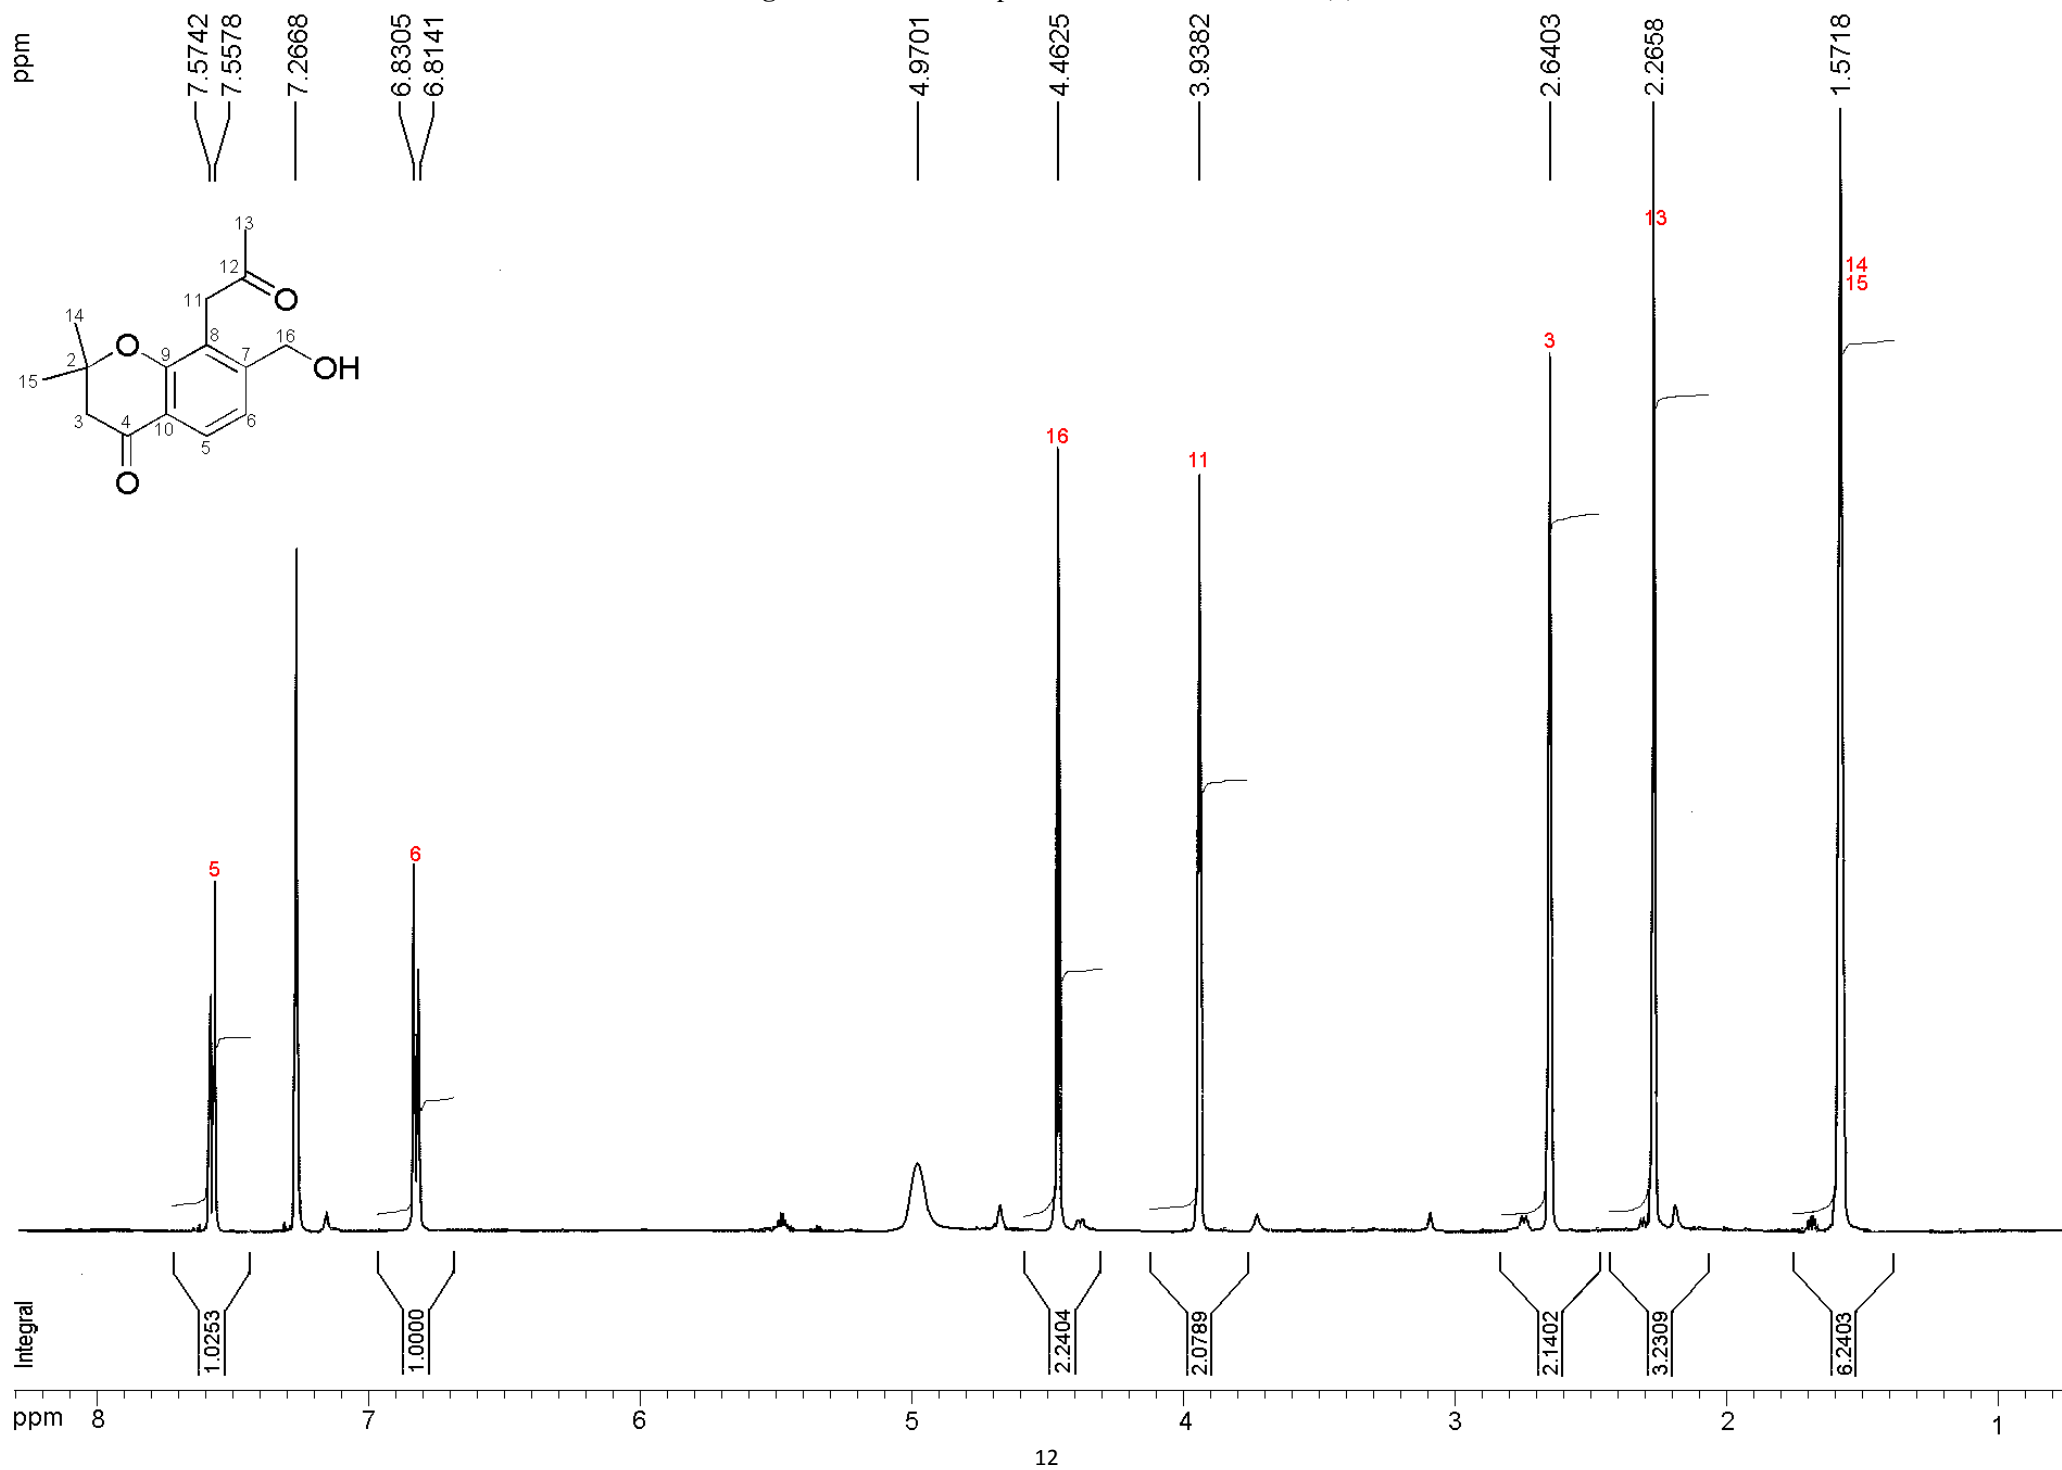

Figure S11. HSQC spectrum of alatachromone A (4)

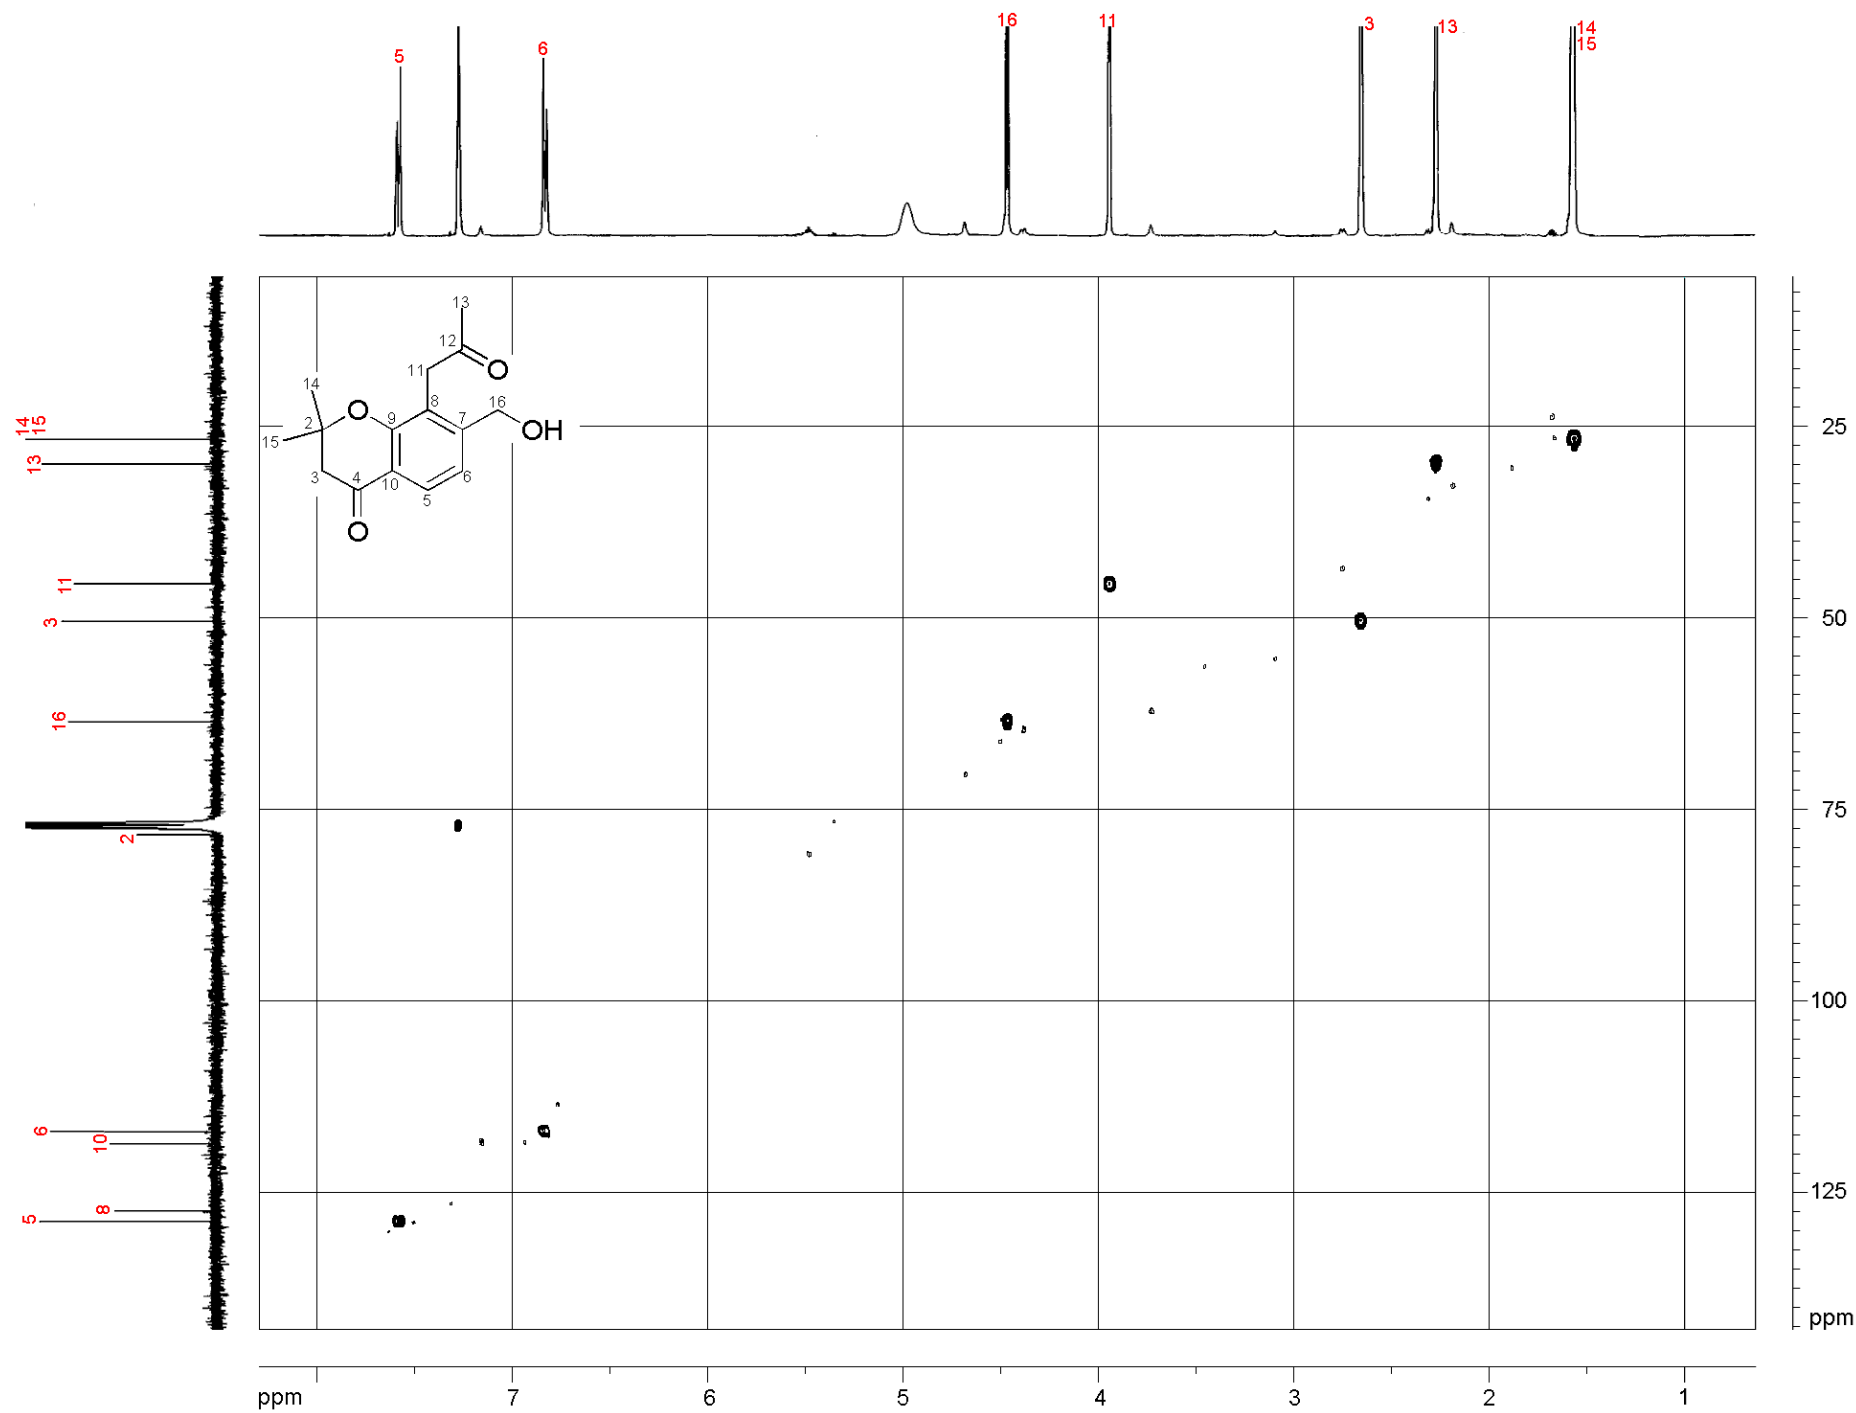

Figure S12. HMBC spectrum of alatachromone A (4)

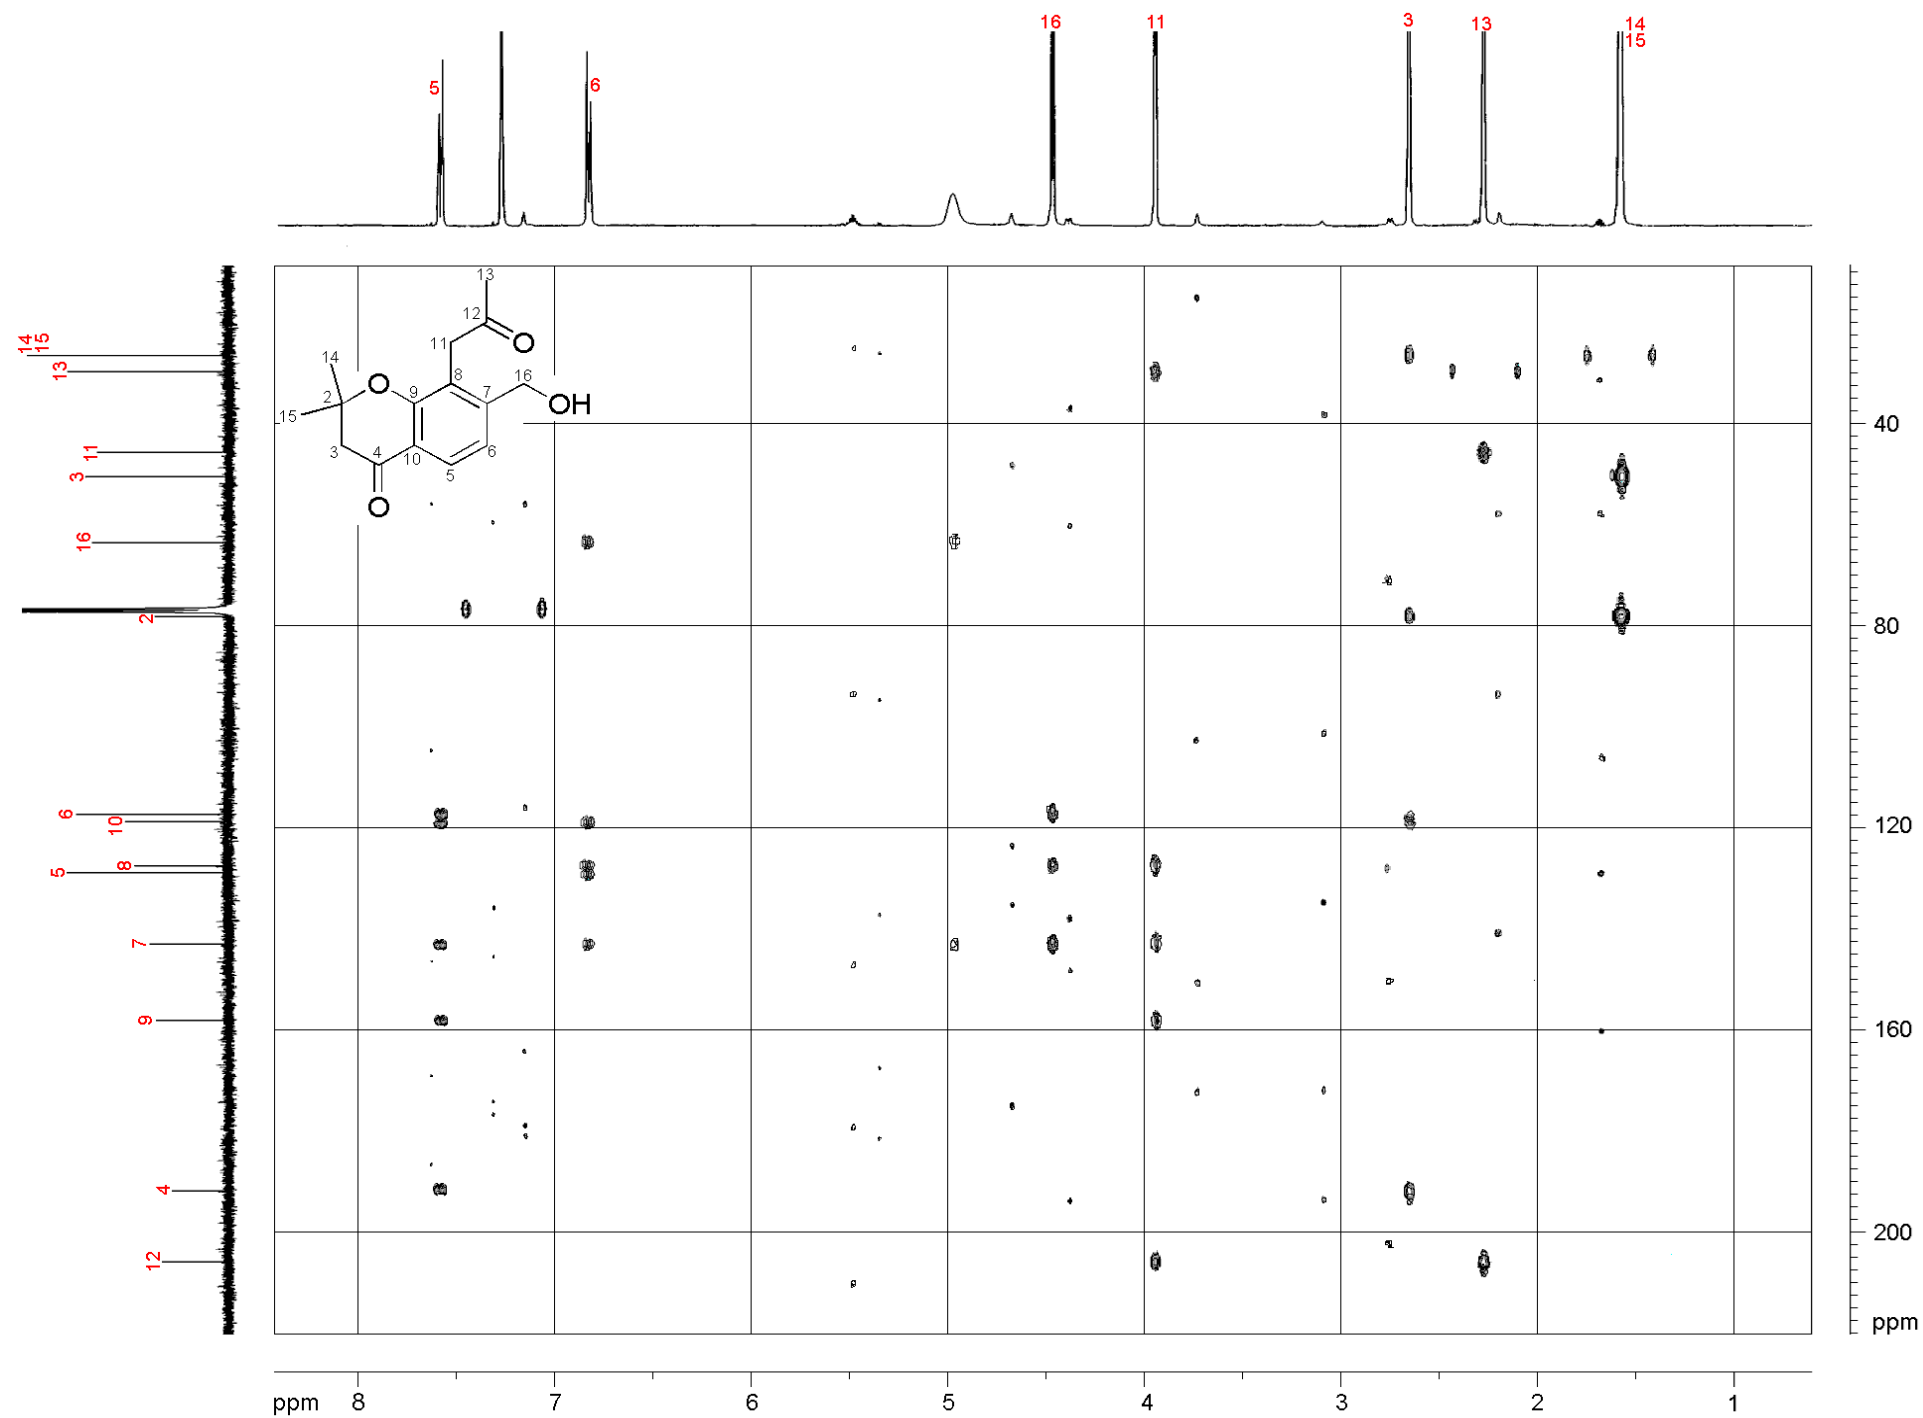

**Figure S13.**  $^{13}\text{C}$  and DEPT NMR spectrum of alataindolein D (**5**)

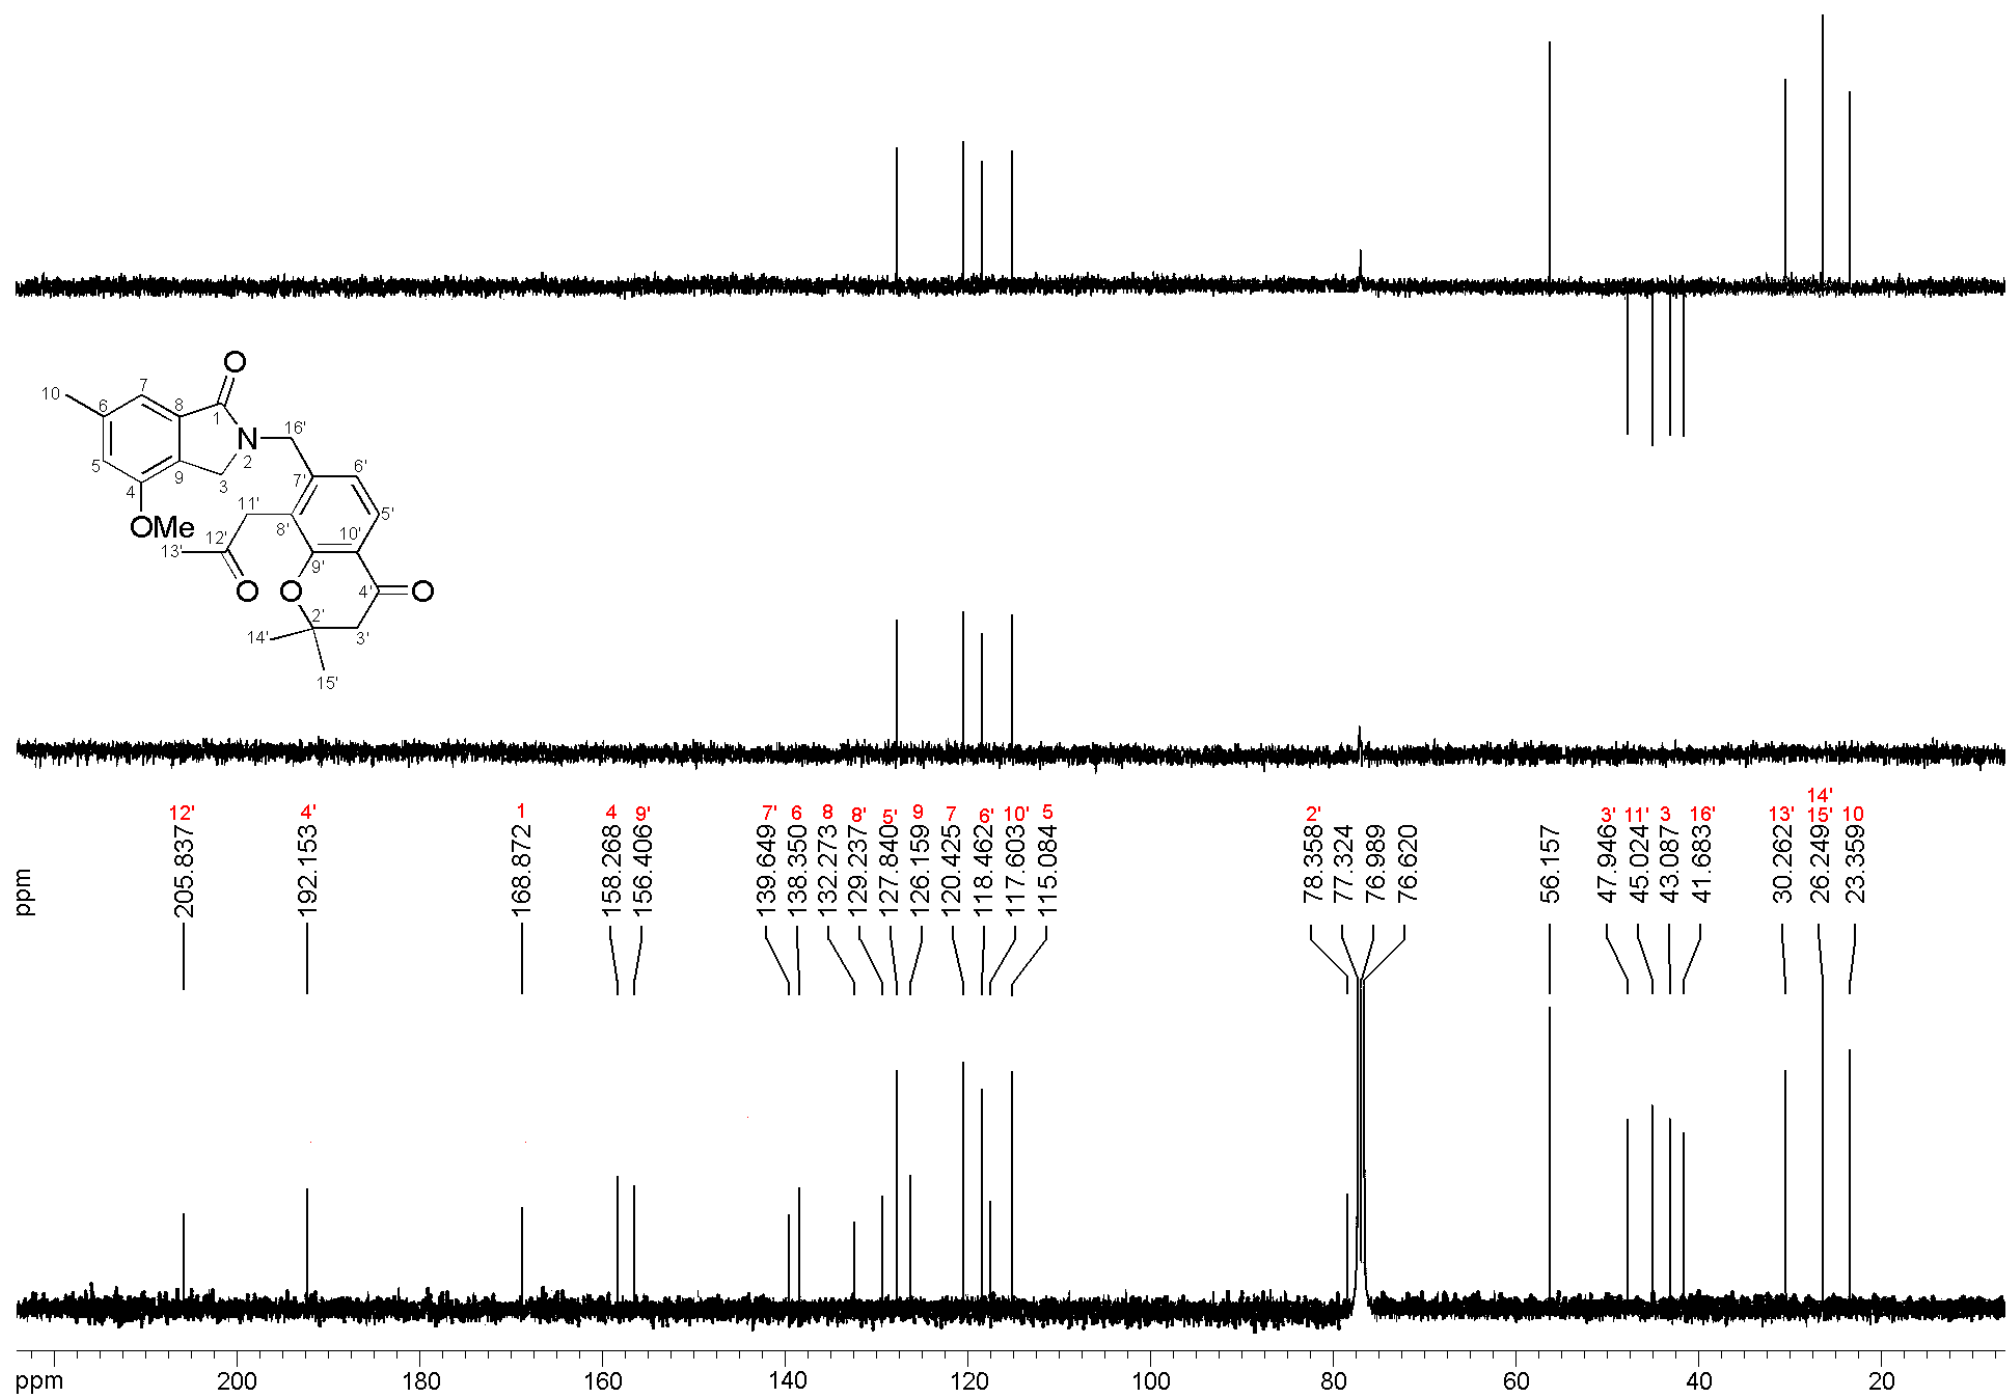

**Figure S14.**  $^1\text{H}$  NMR spectrum of alataindolein D (**5**)

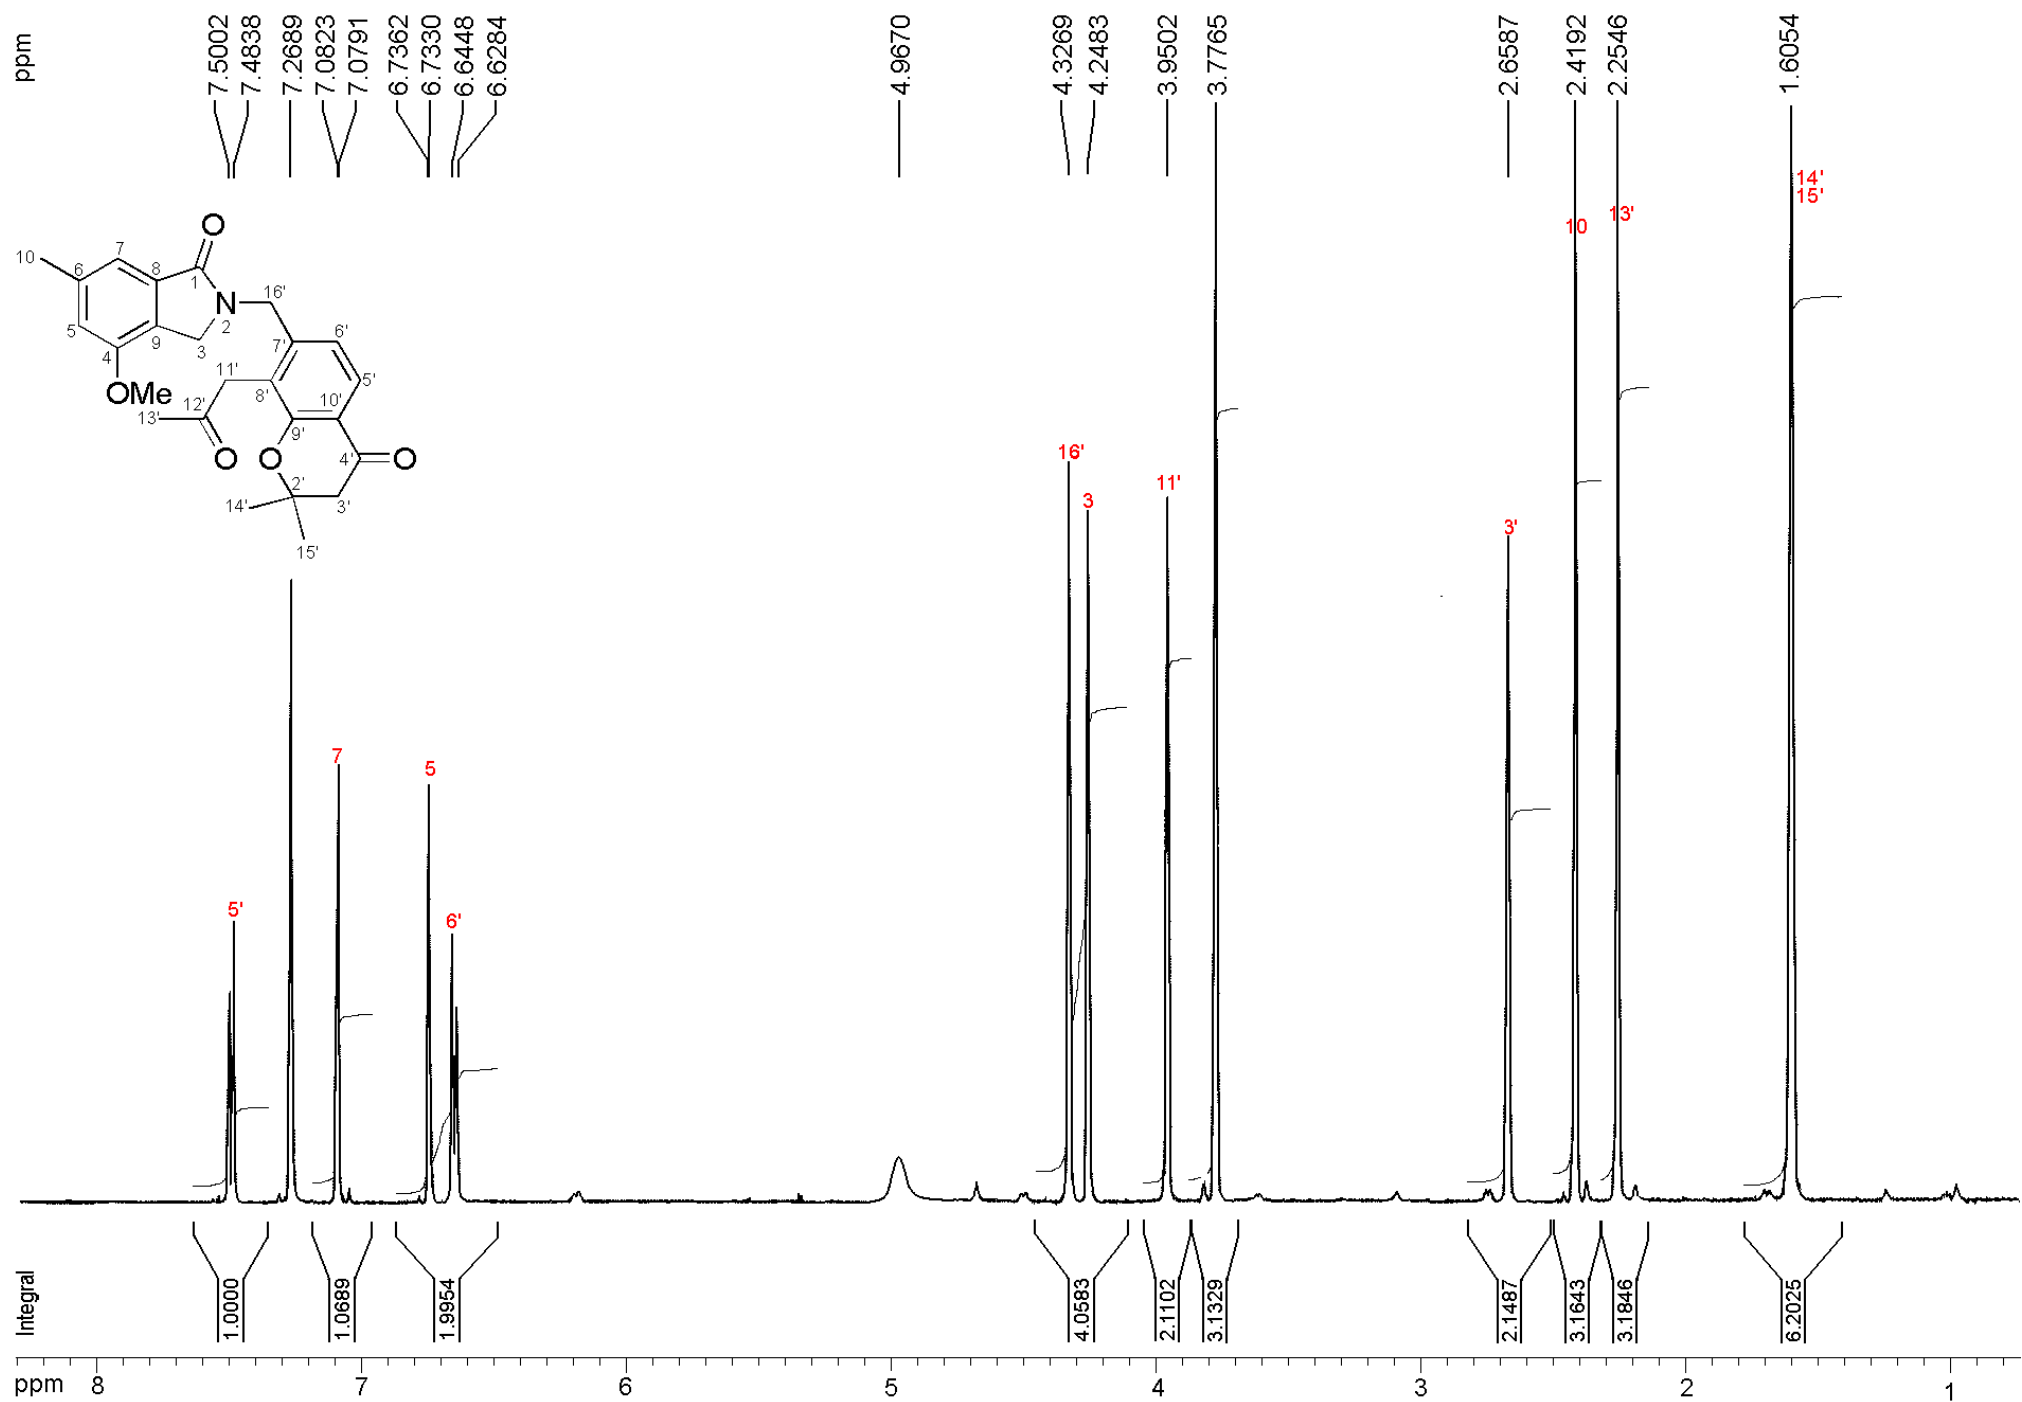



Figure S15. HSQC NMR spectrum of alataindolein D (5)

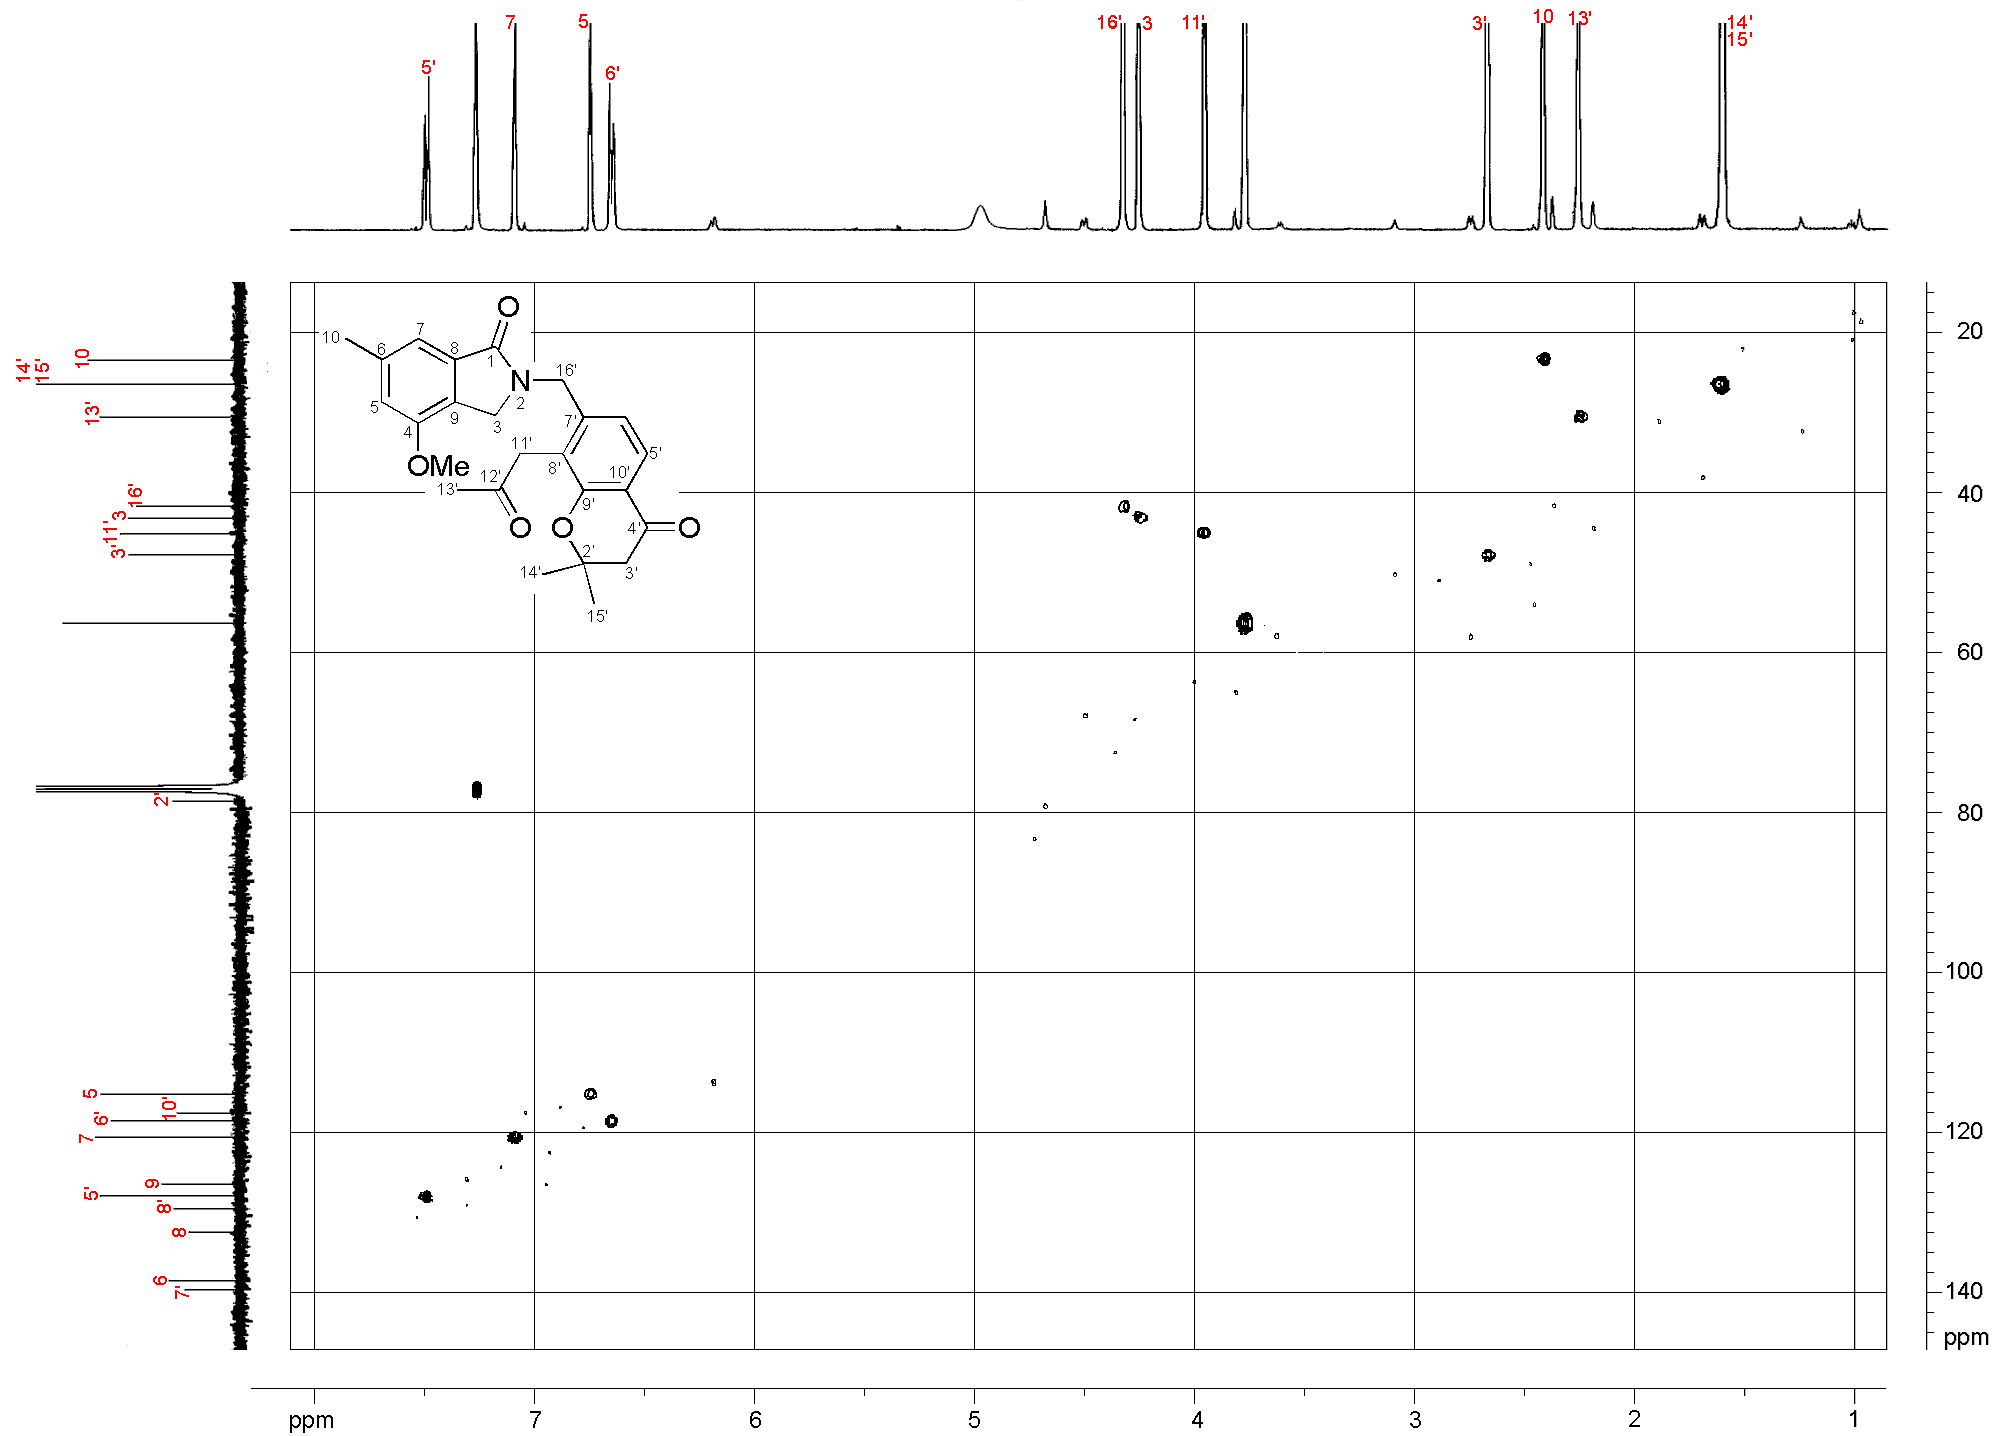

**Figure S12.** HMBC NMR spectrum of alataindolein D (**5**)

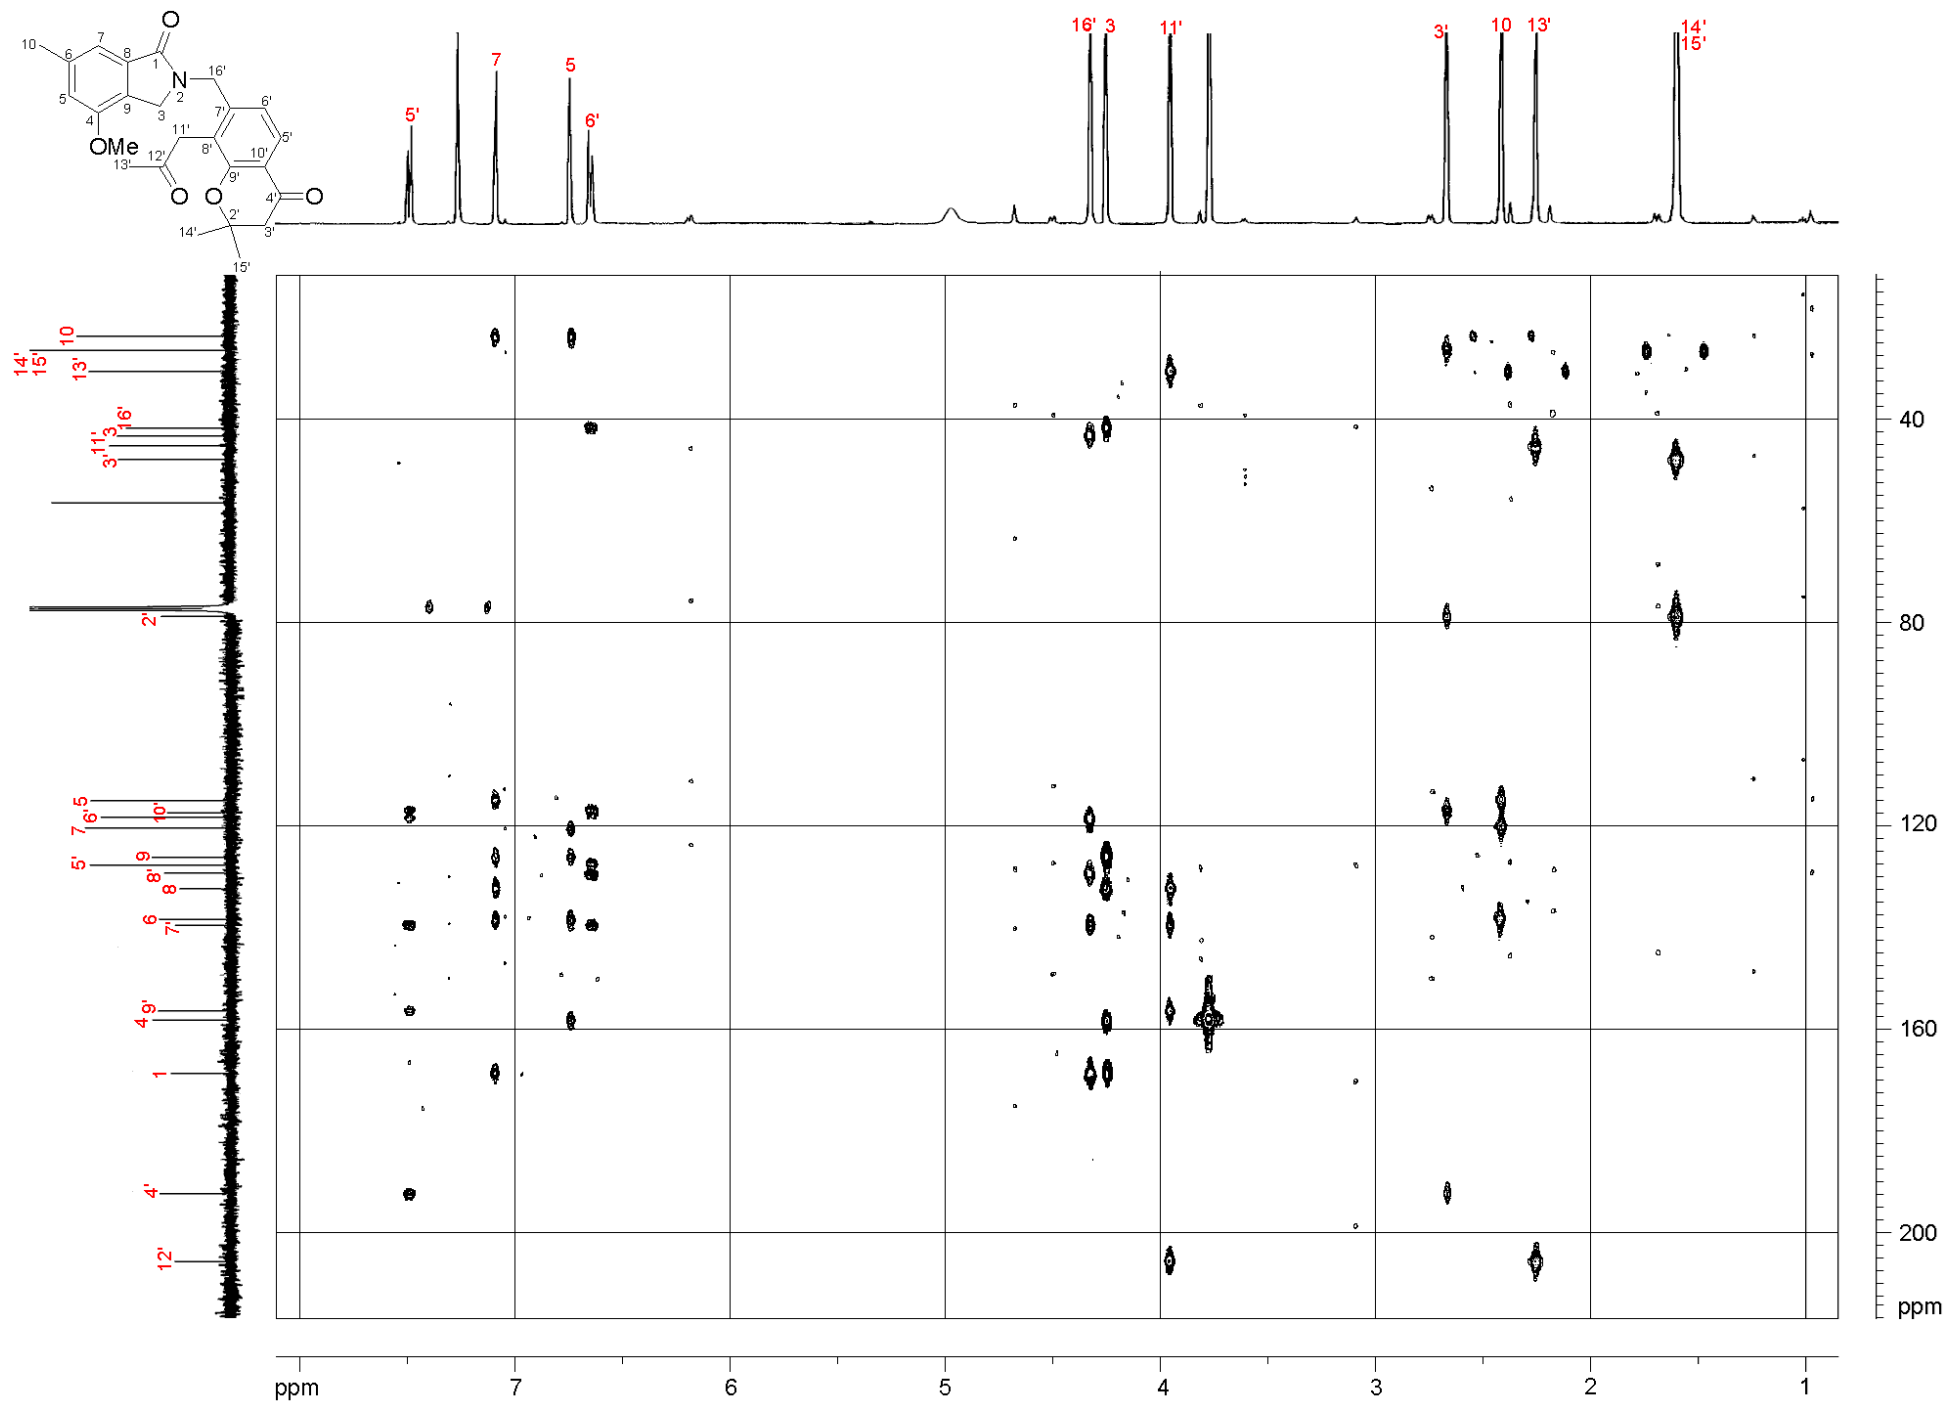

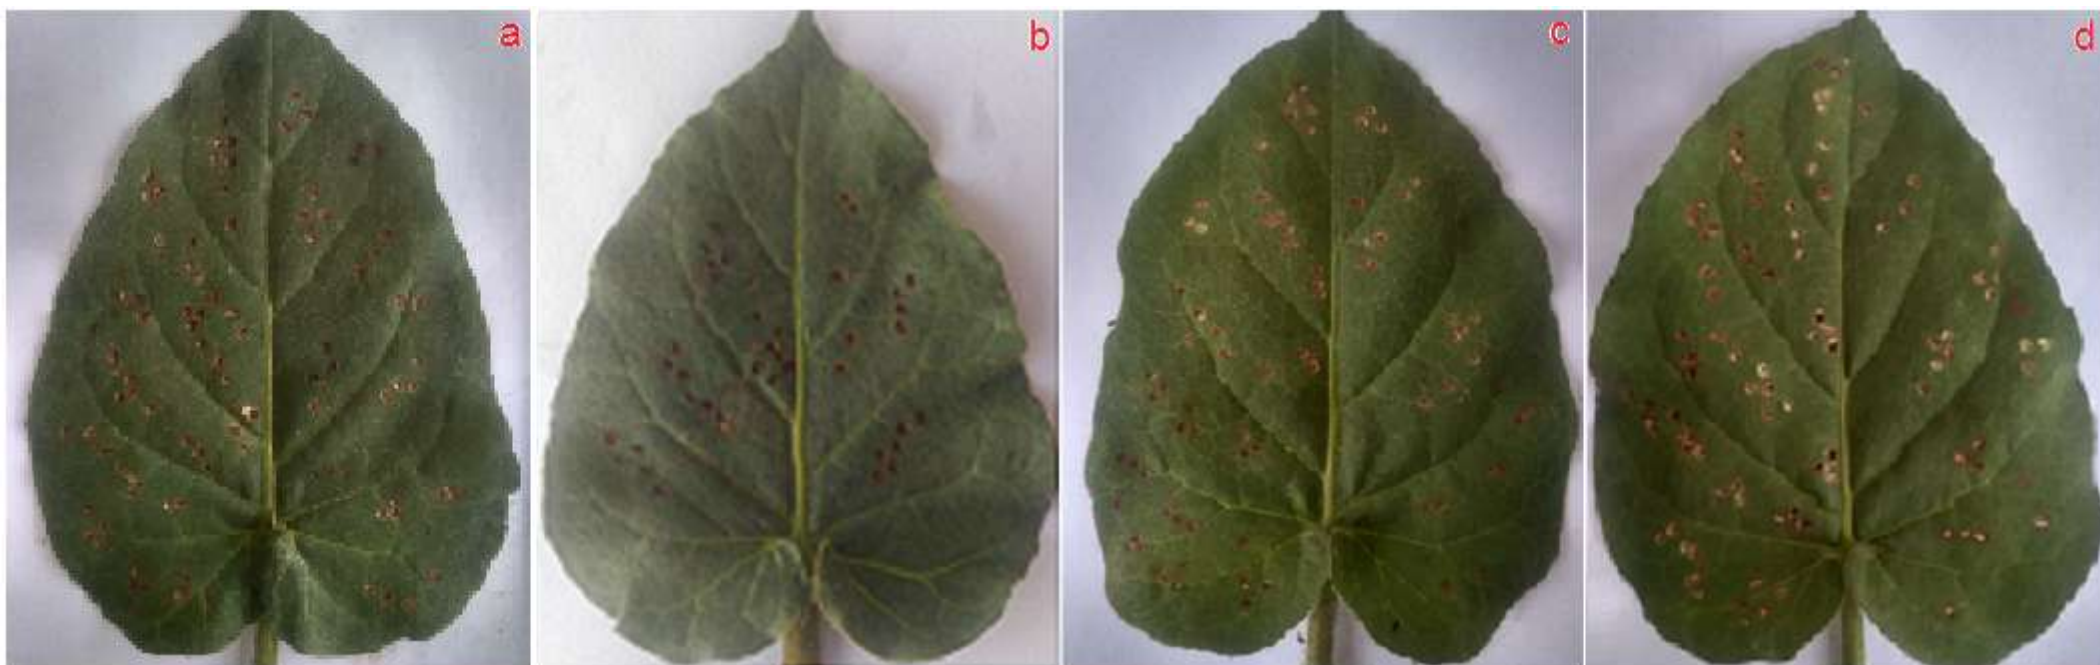

**FigFigure S17.** The antiviral inhibition rates tested by half-leaf method for compounds **2–4**  
[**a.** (ningnanmycin); **b.** (compound **2**); **c.** (compound **3**); **d.** (compound **4**)]

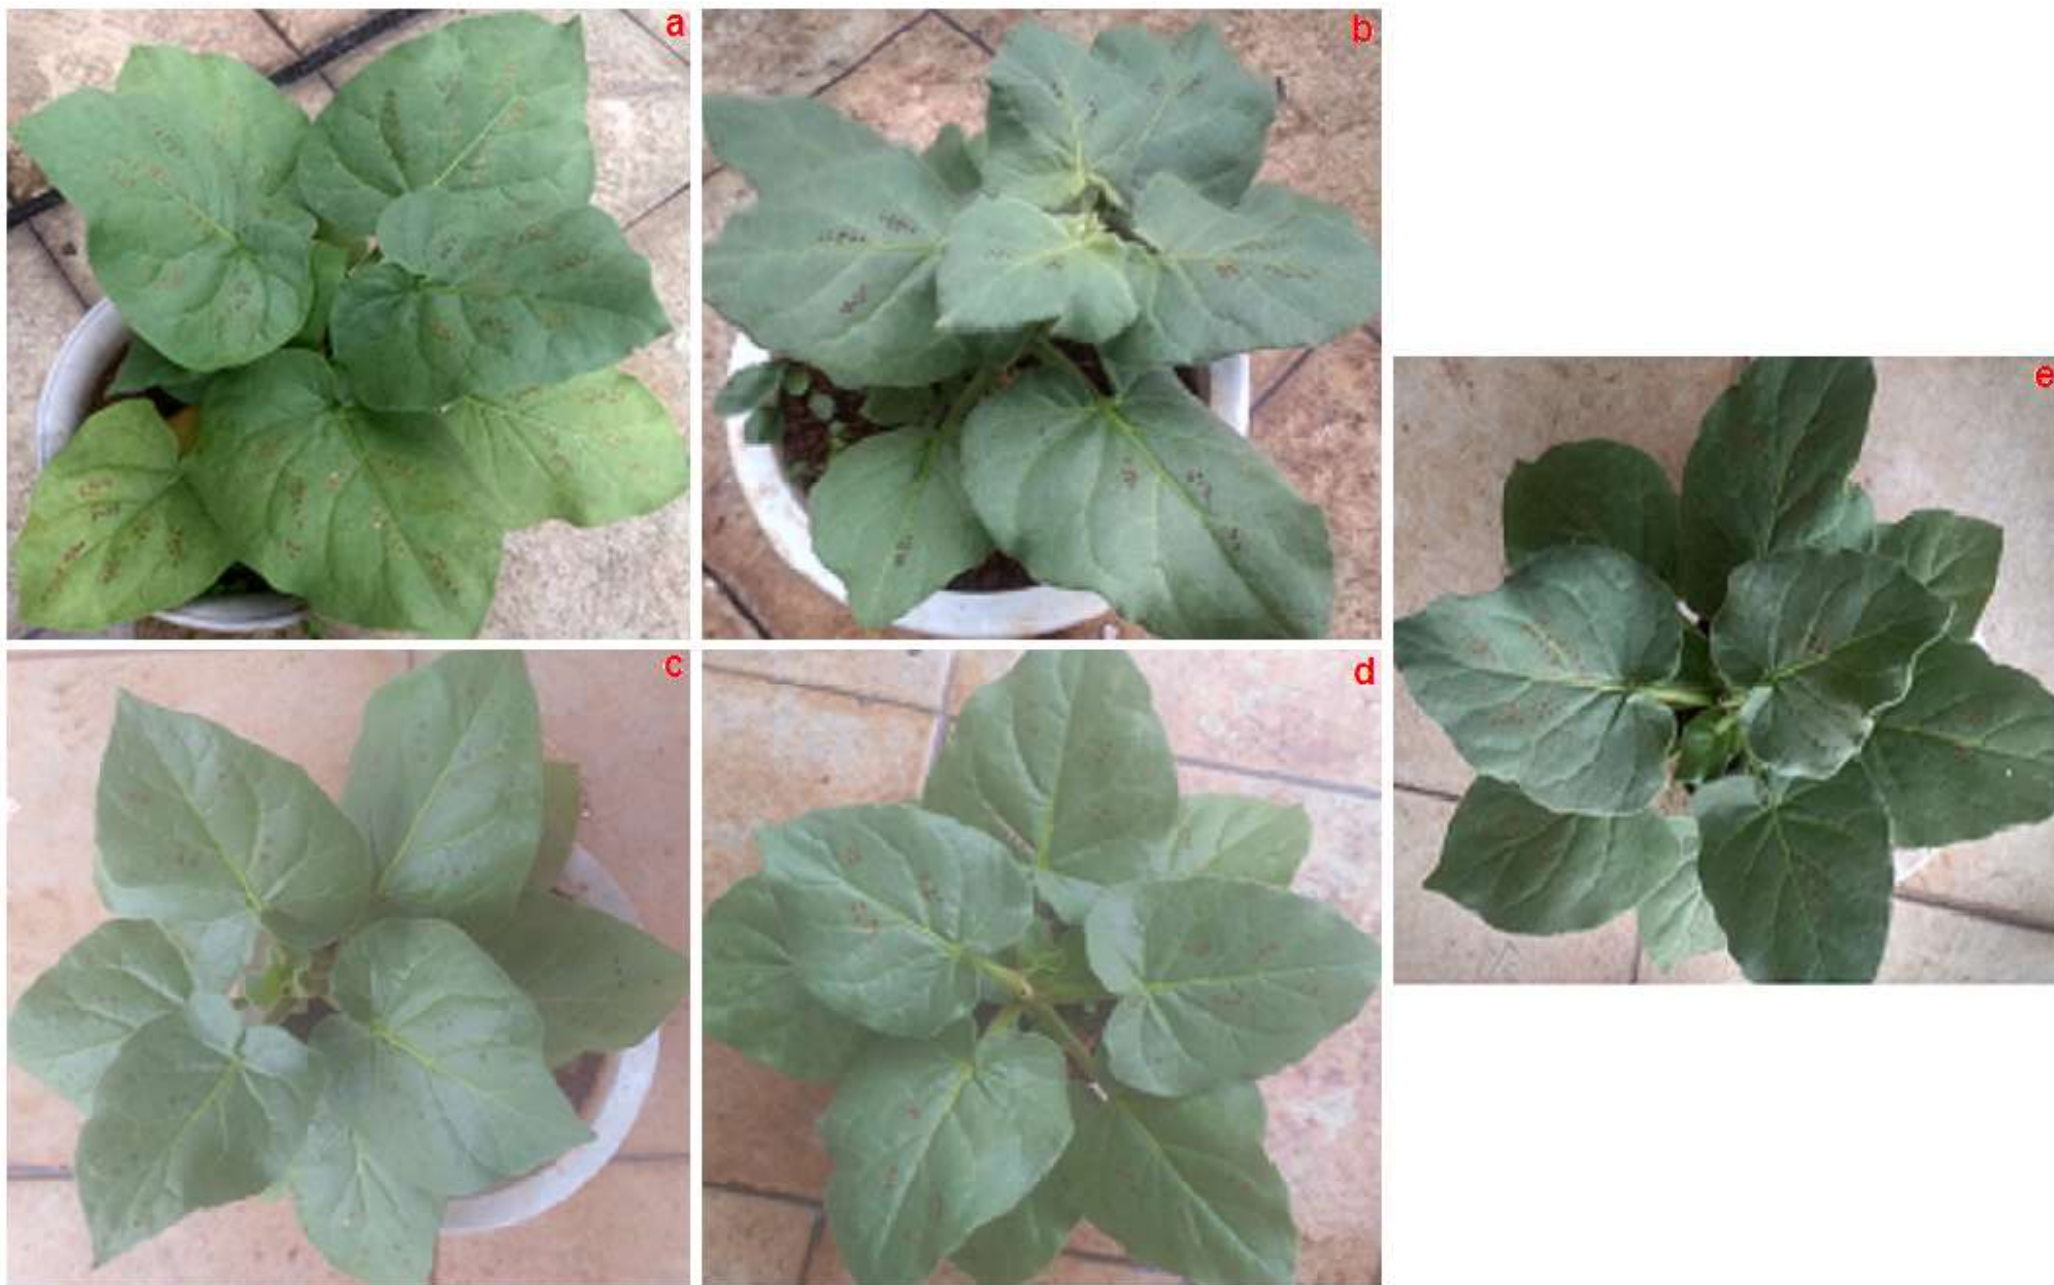

**Figure S18.** The protective effects of compounds **2–4** on TMV

[**a.** control (pretreating the tobacco plant with DMSO solution); **b.** pretreating the tobacco plant with **2**; **c.** pretreating the tobacco plant with **3**; **d.** pretreating the tobacco plant with **4**; **e.** pretreating the tobacco plant with ningnanmycin (positive control)]
